# Supplementary material for: NETO2 promotes progression of prostate cancer by inhibiting the cellular senescence pathway
Source: Research Square preprint supplement (doi:10.21203/rs.3.rs-1682664/v1), 2022-05-25
Supplement: Supplementary file 1 [file 3ce2d7fd8909495fc7b6ff7f.xlsx]

## Sheet: PT-vs-N.limma_Dif
Table S3-1. Differentially expressed genes in GSE21034 database identified by bioinformatics analysis.
row.names(tT)	logFC	AveExpr	t	P.Value	adj.P.Val	B	regulated
SIM2	1.2268	9.37009	10.5923	2.94625e-20	1.29866e-16	35.351	Up-Regulated
PCA3	2.41931	10.0565	10.1532	4.67004e-19	1.14818e-15	32.6661	Up-Regulated
FLJ20184	1.28461	9.01659	9.45597	3.56169e-17	3.03858e-14	28.4547	Up-Regulated
AMACR	1.98667	10.2308	8.93813	8.44169e-16	3.78402e-13	25.3795	Up-Regulated
DNAH5	1.31188	7.4337	8.90242	1.04801e-15	4.54373e-13	25.1694	Up-Regulated
MTHFD2	0.642418	8.11541	8.89618	1.0883e-15	4.64228e-13	25.1328	Up-Regulated
ABCC4	1.13792	10.5733	8.86881	1.28425e-15	5.2182e-13	24.972	Up-Regulated
BICD1	0.846484	8.48967	8.62052	5.72174e-15	2.07292e-12	23.5211	Up-Regulated
TRIB1	1.19002	9.51765	8.37938	2.40751e-14	7.07461e-12	22.1262	Up-Regulated
HPN	0.761833	8.81192	8.33767	3.08209e-14	8.76472e-12	21.8864	Up-Regulated
UAP1	0.822734	8.45801	8.1044	1.21641e-13	2.70149e-11	20.5543	Up-Regulated
EPCAM	0.980117	8.98813	7.93098	3.34178e-13	6.28242e-11	19.574	Up-Regulated
MYC	0.667196	7.98806	7.91554	3.65478e-13	6.8069e-11	19.4872	Up-Regulated
TMTC4	0.591216	8.15838	7.67817	1.43455e-12	2.07319e-10	18.1615	Up-Regulated
LOC100134369	1.09735	10.7957	7.55501	2.89559e-12	3.7724e-10	17.4809	Up-Regulated
GOLM1	1.0373	10.9477	7.49048	4.17495e-12	5.15958e-10	17.1264	Up-Regulated
TSPAN13	0.650999	8.78593	7.47309	4.60671e-12	5.56318e-10	17.0311	Up-Regulated
GLYATL1	1.21103	7.66014	7.3576	8.83043e-12	9.6979e-10	16.4009	Up-Regulated
CAMKK2	0.776488	9.88619	7.14003	2.96951e-11	2.78492e-09	15.2269	Up-Regulated
GNL3	0.604403	9.0213	7.11121	3.48254e-11	3.12213e-09	15.0727	Up-Regulated
C2orf72	0.760765	8.63816	7.10216	3.661e-11	3.23821e-09	15.0244	Up-Regulated
TARP	1.3083	10.6059	6.95832	8.06618e-11	6.20135e-09	14.2603	Up-Regulated
GCNT1	0.993456	8.27467	6.9182	1.00398e-10	7.45813e-09	14.0487	Up-Regulated
LOC728606	1.21326	7.27408	6.90261	1.09295e-10	7.90002e-09	13.9666	Up-Regulated
GMDS	0.623908	9.3007	6.84403	1.50225e-10	1.05385e-08	13.6592	Up-Regulated
SLC43A1	0.707923	8.68418	6.81598	1.74858e-10	1.19187e-08	13.5124	Up-Regulated
TDRD1	1.63712	6.94124	6.72042	2.9259e-10	1.85567e-08	13.015	Up-Regulated
GALNT7	0.824633	9.16819	6.67476	3.73668e-10	2.28231e-08	12.7788	Up-Regulated
NETO2	0.585799	6.45369	6.66074	4.02752e-10	2.43187e-08	12.7064	Up-Regulated
TSPAN1	0.888562	11.0188	6.62161	4.96233e-10	2.90351e-08	12.5049	Up-Regulated
MS4A8B	0.900753	7.14003	6.61866	5.04089e-10	2.93648e-08	12.4897	Up-Regulated
OR51F2	1.40548	7.05798	6.50268	9.31945e-10	4.93931e-08	11.8966	Up-Regulated
OR51T1	1.04127	6.42696	6.49452	9.72926e-10	5.08635e-08	11.855	Up-Regulated
CADM1	0.599239	8.23653	6.47681	1.06802e-09	5.49531e-08	11.7651	Up-Regulated
GPR160	0.978245	7.11998	6.45036	1.2273e-09	6.19436e-08	11.631	Up-Regulated
TRIM36	0.749918	7.14955	6.44511	1.26164e-09	6.33378e-08	11.6043	Up-Regulated
ACSM1	1.45826	8.0769	6.39331	1.65475e-09	8.02994e-08	11.3427	Up-Regulated
DNAJC10	0.791294	8.86209	6.33243	2.27248e-09	1.06372e-07	11.0369	Up-Regulated
GDF15	1.05472	9.68553	6.31961	2.42894e-09	1.12305e-07	10.9727	Up-Regulated
SNORA73A	1.14226	10.7197	6.21674	4.13297e-09	1.74888e-07	10.4605	Up-Regulated
DAPK1	0.719115	8.20963	6.16569	5.3706e-09	2.18854e-07	10.2082	Up-Regulated
MBOAT2	0.618853	9.90986	6.14434	5.99004e-09	2.40028e-07	10.103	Up-Regulated
IQGAP2	0.825072	8.60451	6.1412	6.08679e-09	2.43536e-07	10.0876	Up-Regulated
PDIA5	0.603586	9.07097	6.13834	6.17643e-09	2.46377e-07	10.0735	Up-Regulated
ELAVL2	0.611914	5.91255	6.03202	1.06002e-08	3.94851e-07	9.55363	Up-Regulated
STEAP4	0.594779	11.2014	6.01958	1.12876e-08	4.18101e-07	9.49317	Up-Regulated
MMP26	0.736228	6.10651	5.91405	1.9176e-08	6.56078e-07	8.98349	Up-Regulated
CLDN8	0.807354	7.17732	5.90898	1.96678e-08	6.72033e-07	8.95914	Up-Regulated
C20orf74	0.663937	9.55558	5.88949	2.16762e-08	7.34023e-07	8.86567	Up-Regulated
LOC145837	0.925122	8.42028	5.8743	2.33791e-08	7.87653e-07	8.79298	Up-Regulated
ZNF217	0.599646	9.45894	5.83546	2.83516e-08	9.3493e-07	8.60767	Up-Regulated
SNORD76	0.979399	8.29387	5.72191	4.96066e-08	1.52729e-06	8.07038	Up-Regulated
ALDH1A3	0.60697	10.7319	5.72064	4.99153e-08	1.53501e-06	8.06442	Up-Regulated
EGR2	0.681247	8.10769	5.71238	5.19746e-08	1.59094e-06	8.02561	Up-Regulated
TP53INP1	0.661873	9.60549	5.70416	5.41058e-08	1.64475e-06	7.98704	Up-Regulated
LRIG1	0.620343	10.2362	5.66125	6.66998e-08	1.97316e-06	7.78622	Up-Regulated
HOXC6	0.673921	7.32514	5.63464	7.59041e-08	2.2084e-06	7.6622	Up-Regulated
SNORD47	1.51411	7.35678	5.61762	8.24306e-08	2.36961e-06	7.58308	Up-Regulated
PLA1A	0.828315	7.57287	5.58238	9.77357e-08	2.74981e-06	7.41976	Up-Regulated
PTPRN2	0.649956	8.98846	5.56909	1.04198e-07	2.90381e-06	7.35837	Up-Regulated
SNORD34	0.644001	7.6076	5.46344	1.72791e-07	4.55791e-06	6.87369	Up-Regulated
MYBPC1	1.15882	9.54116	5.44982	1.84351e-07	4.81772e-06	6.81167	Up-Regulated
RPL7P16	0.692424	10.3355	5.44598	1.87743e-07	4.90151e-06	6.79421	Up-Regulated
SNORA71D	0.813166	8.34233	5.44351	1.89954e-07	4.94948e-06	6.78299	Up-Regulated
SNORD78	0.957178	7.78253	5.37913	2.57568e-07	6.37819e-06	6.49149	Up-Regulated
EDEM3	0.596377	8.71622	5.36521	2.7502e-07	6.73468e-06	6.42875	Up-Regulated
LOC100127975	0.730711	7.9949	5.32672	3.29467e-07	7.89975e-06	6.25594	Up-Regulated
FNIP2	0.682566	8.72707	5.29975	3.73731e-07	8.80932e-06	6.13539	Up-Regulated
CYP2J2	0.63929	7.03706	5.22139	5.37805e-07	1.2209e-05	5.7875	Up-Regulated
LOC100130019	0.779705	7.3031	5.0975	9.49249e-07	1.99879e-05	5.24501	Up-Regulated
LOC100131111	0.779705	7.3031	5.0975	9.49249e-07	1.99879e-05	5.24501	Up-Regulated
LOC100131867	0.779705	7.3031	5.0975	9.49249e-07	1.99879e-05	5.24501	Up-Regulated
SNORD56	0.673591	6.58463	5.01958	1.3507e-06	2.72064e-05	4.90865	Up-Regulated
OR51A7	0.96483	6.25594	4.97954	1.61687e-06	3.19352e-05	4.73724	Up-Regulated
COLEC12	0.639834	8.17196	4.97194	1.67284e-06	3.28934e-05	4.70482	Up-Regulated
LOC648999	0.779545	9.59367	4.97027	1.68544e-06	3.30919e-05	4.69767	Up-Regulated
SLC45A2	0.72184	7.1427	4.94362	1.89845e-06	3.66484e-05	4.58431	Up-Regulated
SNORA40	0.623901	7.65613	4.85744	2.78147e-06	5.12266e-05	4.22079	Up-Regulated
SNORD29	0.80446	7.61595	4.83094	3.12533e-06	5.64587e-05	4.10994	Up-Regulated
FASN	0.65095	10.2487	4.81358	3.3724e-06	5.99798e-05	4.0376	Up-Regulated
MYO6	0.764499	8.77882	4.80772	3.46002e-06	6.1127e-05	4.01322	Up-Regulated
CACNA1D	0.876565	8.70688	4.78415	3.8353e-06	6.68195e-05	3.91535	Up-Regulated
LOC100134041	0.603943	7.5721	4.76188	4.22575e-06	7.28068e-05	3.82324	Up-Regulated
RAB3B	0.735982	9.43507	4.73848	4.67745e-06	7.95527e-05	3.72678	Up-Regulated
ERG	1.37536	8.34961	4.71368	5.2069e-06	8.72114e-05	3.62497	Up-Regulated
SNORA71A	0.797885	7.51452	4.71331	5.21518e-06	8.72949e-05	3.62346	Up-Regulated
SLC27A2	0.650607	7.08722	4.71063	5.27596e-06	8.81975e-05	3.61246	Up-Regulated
SERPINA3	1.18308	9.5291	4.61039	8.10501e-06	0.000128663	3.20524	Up-Regulated
ENTPD5	0.610603	9.22462	4.59399	8.68976e-06	0.000136471	3.13922	Up-Regulated
ELOVL2	0.767028	7.82244	4.54545	1.06677e-05	0.000163268	2.94498	Up-Regulated
SCIN	0.676853	7.38459	4.52918	1.14228e-05	0.000172727	2.88023	Up-Regulated
HLA-DMB	0.762739	8.82679	4.40507	1.91404e-05	0.00027012	2.39215	Up-Regulated
TMEFF2	1.12882	9.29925	4.38453	2.0827e-05	0.00029036	2.31239	Up-Regulated
SNORD36B	0.624934	6.09963	4.38413	2.08611e-05	0.000290682	2.31085	Up-Regulated
SNORD101	0.639034	5.94628	4.32857	2.61772e-05	0.000348069	2.09663	Up-Regulated
ATP8A2	0.721967	6.53453	4.31637	2.75079e-05	0.000361941	2.04987	Up-Regulated
TMEM178	0.61493	8.91987	4.30498	2.88088e-05	0.000376206	2.0063	Up-Regulated
SLC10A5	0.608216	5.82341	4.30013	2.93807e-05	0.000382397	1.98777	Up-Regulated
ACSM3	0.650742	7.70941	4.29152	3.04217e-05	0.000393622	1.95495	Up-Regulated
FMO5	0.644891	7.19981	4.26693	3.35954e-05	0.000429019	1.86144	Up-Regulated
SPON2	0.924669	9.63	4.19813	4.42478e-05	0.000540019	1.60216	Up-Regulated
PLA2G7	0.944572	8.63723	4.18623	4.63913e-05	0.000559977	1.55766	Up-Regulated
ODC1	0.617672	10.8366	4.15251	5.30208e-05	0.000622112	1.43207	Up-Regulated
MIPEP	0.779136	8.63132	4.04347	8.12241e-05	0.000886559	1.03166	Up-Regulated
FOSB	0.826006	9.51051	4.0049	9.42703e-05	0.00100323	0.892054	Up-Regulated
EMP1	0.587971	8.14955	3.9911	9.94013e-05	0.00104237	0.842413	Up-Regulated
SPOCK1	0.608259	9.69664	3.97781	0.000104597	0.00108396	0.794707	Up-Regulated
SLC38A11	0.790105	7.76472	3.96751	0.000108801	0.00112007	0.757814	Up-Regulated
PCGEM1	1.16972	7.4193	3.95595	0.000113709	0.00116155	0.716527	Up-Regulated
KCNH8	0.615308	6.87279	3.95348	0.000114785	0.00117164	0.707714	Up-Regulated
GRPR	0.608965	6.33589	3.91178	0.000134477	0.00133353	0.559644	Up-Regulated
OR51E1	0.948915	8.77859	3.84932	0.000170083	0.00161168	0.340261	Up-Regulated
NAMPT	0.592044	9.11729	3.84225	0.000174633	0.00164249	0.315628	Up-Regulated
ZFP36	0.628371	9.8647	3.80985	0.000197014	0.00180043	0.203161	Up-Regulated
LOC100133696	0.979638	7.04392	3.79921	0.000204946	0.00185878	0.166368	Up-Regulated
PCOTH	0.865635	7.61126	3.656	0.000345727	0.00286909	-0.319998	Up-Regulated
CRISP3	1.12247	6.79292	3.5832	0.000448456	0.0035069	-0.561216	Up-Regulated
FOLH1	0.806984	9.77634	3.46038	0.000689452	0.00497515	-0.958745	Up-Regulated
TRPM8	0.587291	10.0732	3.45985	0.000690707	0.00498149	-0.960423	Up-Regulated
SNORD28	0.632912	5.42961	3.31403	0.00113429	0.00740705	-1.41678	Up-Regulated
FOLH1B	0.742508	9.77097	3.28843	0.0012355	0.00790783	-1.49516	Up-Regulated
LOC100133761	0.822239	8.68504	3.26303	0.00134417	0.00847822	-1.57239	Up-Regulated
FABP5L2	0.625533	7.29329	3.18836	0.00171727	0.010266	-1.79636	Up-Regulated
FABP5	0.621427	7.26223	3.13796	0.00202116	0.0117197	-1.94493	Up-Regulated
FABP5L7	0.621427	7.26223	3.13796	0.00202116	0.0117197	-1.94493	Up-Regulated
C15orf48	0.637124	7.03905	3.07292	0.00248712	0.0138449	-2.13362	Up-Regulated
FAM3B	0.640889	9.18111	3.05667	0.00261806	0.01441	-2.1802	Up-Regulated
AGR2	0.685246	9.35776	3.04961	0.0026769	0.014691	-2.20037	Up-Regulated
NCAPD3	0.700161	10.1132	3.00777	0.00305148	0.0163299	-2.31906	Up-Regulated
NPY	0.742538	9.63782	2.75883	0.00646767	0.0297583	-2.99477	Up-Regulated
RNU5A	0.622768	7.51134	2.61129	0.0098662	0.0415628	-3.37021	Up-Regulated
C15orf41	-0.727951	7.02866	-12.5094	1.44758e-25	3.82841e-21	47.2184	Down-Regulated
CPA6	-1.21683	6.32311	-11.3967	1.78483e-22	2.36017e-18	40.3111	Down-Regulated
TCEAL2	-0.756277	8.31879	-10.9438	3.18259e-21	2.80566e-17	37.513	Down-Regulated
LOC647886	-0.682435	8.53981	-10.8381	6.22355e-21	4.11486e-17	36.8615	Down-Regulated
KANK1	-0.605806	8.17297	-10.2447	2.63023e-19	8.69522e-16	33.224	Down-Regulated
VSNL1	-0.748933	6.23248	-10.1908	3.68772e-19	1.08366e-15	32.8956	Down-Regulated
LOC730427	-0.863353	8.5102	-10.1496	4.77556e-19	1.14818e-15	32.6444	Down-Regulated
ADAMTSL3	-0.942664	7.52446	-10.065	8.10924e-19	1.65059e-15	32.1299	Down-Regulated
DUOX1	-0.59925	7.79851	-10.0643	8.14839e-19	1.65059e-15	32.1252	Down-Regulated
ROR2	-0.674899	8.07445	-10.0531	8.73755e-19	1.65059e-15	32.0574	Down-Regulated
SEMA6D	-0.683957	6.52763	-9.95123	1.65089e-18	2.76179e-15	31.4391	Down-Regulated
NAV2	-0.746529	7.80667	-9.9493	1.67084e-18	2.76179e-15	31.4275	Down-Regulated
ZNF185	-0.887976	8.13468	-9.92411	1.95516e-18	2.96048e-15	31.2748	Down-Regulated
PCDH7	-0.686387	7.60041	-9.91928	2.01492e-18	2.96048e-15	31.2455	Down-Regulated
PIP5K1B	-0.614524	6.16014	-9.86006	2.91402e-18	3.90598e-15	30.887	Down-Regulated
ACSF2	-0.644158	7.31662	-9.85788	2.95382e-18	3.90598e-15	30.8738	Down-Regulated
PPP1R3C	-1.25181	8.07455	-9.66604	9.72523e-18	1.17156e-14	29.7159	Down-Regulated
GABRE	-1.2721	8.22192	-9.64533	1.10567e-17	1.27137e-14	29.5913	Down-Regulated
ALAD	-0.6051	8.24239	-9.63744	1.16106e-17	1.27944e-14	29.5438	Down-Regulated
ITGA3	-0.592618	8.28304	-9.62058	1.28875e-17	1.32176e-14	29.4424	Down-Regulated
C5orf4	-0.602406	7.27589	-9.49615	2.78029e-17	2.62608e-14	28.6953	Down-Regulated
MYL6	-0.634529	10.9092	-9.48781	2.9269e-17	2.66924e-14	28.6454	Down-Regulated
HSPB1	-0.743401	11.0032	-9.44196	3.88286e-17	3.11182e-14	28.3708	Down-Regulated
LOC100134430	-0.914887	9.29107	-9.42806	4.22981e-17	3.29017e-14	28.2876	Down-Regulated
MEIS2	-1.18341	8.49882	-9.37082	6.01516e-17	4.41897e-14	27.9455	Down-Regulated
HSPBL2	-0.725833	10.7599	-9.34109	7.22057e-17	5.16115e-14	27.7681	Down-Regulated
PARVA	-0.734052	9.61206	-9.26199	1.17289e-16	8.16301e-14	27.2967	Down-Regulated
AHNAK2	-0.896739	8.51007	-9.24649	1.2897e-16	8.74585e-14	27.2045	Down-Regulated
RRAS	-0.633092	9.87407	-9.21433	1.57026e-16	1.0129e-13	27.0133	Down-Regulated
ST5	-0.73917	8.06111	-9.17485	1.99897e-16	1.22946e-13	26.7788	Down-Regulated
GSTP1	-1.0542	9.83031	-9.16836	2.07972e-16	1.25005e-13	26.7403	Down-Regulated
EFNA5	-0.724246	7.52038	-9.13426	2.56113e-16	1.44115e-13	26.5381	Down-Regulated
DNAJB5	-0.646576	8.18209	-8.99648	5.92496e-16	3.06137e-13	25.7233	Down-Regulated
TUBA4A	-0.615061	8.5864	-8.99388	6.01926e-16	3.06137e-13	25.708	Down-Regulated
CAV1	-1.03608	7.96505	-8.98012	6.54344e-16	3.26518e-13	25.6269	Down-Regulated
ST6GALNAC2	-0.680449	7.13984	-8.961	7.34854e-16	3.50479e-13	25.5142	Down-Regulated
LARGE	-0.613499	8.32702	-8.9551	7.61618e-16	3.53377e-13	25.4794	Down-Regulated
APOBEC3C	-0.858544	7.77733	-8.89133	1.12074e-15	4.70481e-13	25.1042	Down-Regulated
GEFT	-0.669951	7.91919	-8.86651	1.30223e-15	5.2182e-13	24.9585	Down-Regulated
FABP3	-0.7554	7.40031	-8.77016	2.32918e-15	9.19401e-13	24.3938	Down-Regulated
FREQ	-0.713451	7.88201	-8.69603	3.63802e-15	1.39442e-12	23.9608	Down-Regulated
HSPA4L	-0.779361	6.47293	-8.59642	6.60979e-15	2.33079e-12	23.381	Down-Regulated
C12orf75	-0.676932	8.11065	-8.57151	7.67146e-15	2.60112e-12	23.2364	Down-Regulated
STXBP5L	-0.599538	6.20276	-8.56071	8.18271e-15	2.73934e-12	23.1738	Down-Regulated
NDRG2	-0.673919	8.93892	-8.47964	1.32704e-14	4.33285e-12	22.7044	Down-Regulated
SYNM	-1.01164	9.84788	-8.47386	1.37353e-14	4.37659e-12	22.6709	Down-Regulated
HOXD10	-1.04348	7.86148	-8.45853	1.50463e-14	4.73726e-12	22.5824	Down-Regulated
AOX1	-1.07352	7.59344	-8.44704	1.61109e-14	4.95447e-12	22.5161	Down-Regulated
WFDC1	-0.782029	8.81322	-8.42452	1.84174e-14	5.47286e-12	22.3862	Down-Regulated
PGM5P2	-0.930813	9.121	-8.36898	2.56048e-14	7.44143e-12	22.0664	Down-Regulated
TSPAN18	-0.7196	8.31468	-8.31229	3.58126e-14	1.00759e-11	21.7408	Down-Regulated
LOC648795	-0.798994	9.22898	-8.29311	4.01077e-14	1.10493e-11	21.6308	Down-Regulated
LOC440296	-0.83051	8.68775	-8.28691	4.16042e-14	1.13434e-11	21.5953	Down-Regulated
MYOCD	-0.963382	7.93101	-8.28428	4.2254e-14	1.13851e-11	21.5803	Down-Regulated
CLU	-0.93014	9.43447	-8.26607	4.70473e-14	1.23194e-11	21.476	Down-Regulated
LOC729468	-1.3287	10.2433	-8.20758	6.6397e-14	1.68846e-11	21.1417	Down-Regulated
LOC440302	-0.79013	8.73957	-8.1863	7.52479e-14	1.84872e-11	21.0203	Down-Regulated
ACTC1	-1.00263	7.64321	-8.18378	7.63671e-14	1.85292e-11	21.0059	Down-Regulated
HSPB6	-0.68614	8.35572	-8.17374	8.10098e-14	1.9477e-11	20.9487	Down-Regulated
PGM5	-1.1209	9.14006	-8.13478	1.01811e-13	2.32958e-11	20.7269	Down-Regulated
ANO1	-0.596507	7.83929	-8.13005	1.04672e-13	2.34747e-11	20.7	Down-Regulated
FGFR2	-0.906499	8.08387	-8.12994	1.04738e-13	2.34747e-11	20.6994	Down-Regulated
ANTXR1	-0.892143	8.91531	-8.08481	1.36407e-13	2.93298e-11	20.4431	Down-Regulated
SCRN1	-0.731649	8.81288	-8.05473	1.62623e-13	3.3924e-11	20.2726	Down-Regulated
ANGPT1	-0.71168	6.58631	-8.05443	1.62905e-13	3.3924e-11	20.2709	Down-Regulated
SCGB1A1	-1.36921	7.99685	-8.00854	2.12899e-13	4.17077e-11	20.0113	Down-Regulated
PRKG1	-0.671674	6.56977	-7.93067	3.34776e-13	6.28242e-11	19.5723	Down-Regulated
SVIL	-0.891105	9.27348	-7.9043	3.90096e-13	7.06634e-11	19.424	Down-Regulated
PCP4	-1.14108	9.16955	-7.89843	4.03592e-13	7.21203e-11	19.391	Down-Regulated
PDZRN4	-0.598767	6.48506	-7.86689	4.844e-13	8.37315e-11	19.214	Down-Regulated
ILK	-0.620398	9.63562	-7.8617	4.99161e-13	8.57227e-11	19.1849	Down-Regulated
MSRB3	-0.728449	9.28434	-7.85294	5.25082e-13	8.95926e-11	19.1358	Down-Regulated
CAPN6	-0.649388	7.14068	-7.81981	6.35736e-13	1.05744e-10	18.9504	Down-Regulated
CKB	-0.782604	10.3469	-7.81059	6.70447e-13	1.09453e-10	18.8989	Down-Regulated
TPM2	-0.94259	9.67943	-7.76468	8.7331e-13	1.39135e-10	18.6426	Down-Regulated
LGALS1	-0.624578	9.9575	-7.74681	9.67771e-13	1.51448e-10	18.543	Down-Regulated
CNN1	-1.02157	10.0788	-7.72794	1.07857e-12	1.64884e-10	18.4379	Down-Regulated
LOC100129436	-0.713906	7.16129	-7.70171	1.25365e-12	1.88383e-10	18.2921	Down-Regulated
SLC14A1	-1.55572	9.59675	-7.70033	1.26358e-12	1.88447e-10	18.2845	Down-Regulated
KANK2	-0.596731	9.08873	-7.69967	1.26833e-12	1.88447e-10	18.2809	Down-Regulated
DKK3	-0.677326	9.08374	-7.67995	1.41996e-12	2.06339e-10	18.1714	Down-Regulated
TRIM29	-1.10127	8.49897	-7.67169	1.48876e-12	2.12828e-10	18.1255	Down-Regulated
TMLHE	-0.602445	6.96529	-7.66989	1.50414e-12	2.13871e-10	18.1156	Down-Regulated
NCAM1	-0.669052	7.45601	-7.60461	2.18348e-12	2.97662e-10	17.7544	Down-Regulated
FRMD6	-0.744646	7.56308	-7.60028	2.23809e-12	3.03542e-10	17.7305	Down-Regulated
DMD	-0.901562	7.58285	-7.59633	2.28891e-12	3.08851e-10	17.7087	Down-Regulated
DES	-0.876952	10.509	-7.56159	2.78921e-12	3.68831e-10	17.5172	Down-Regulated
LMOD1	-0.895083	9.30709	-7.55787	2.84878e-12	3.73164e-10	17.4967	Down-Regulated
ID1	-0.967499	8.15192	-7.55779	2.8502e-12	3.73164e-10	17.4962	Down-Regulated
MYL9	-0.781593	10.7287	-7.47571	4.53895e-12	5.54319e-10	17.0454	Down-Regulated
ALDH2	-0.663118	9.0757	-7.46801	4.74086e-12	5.64781e-10	17.0033	Down-Regulated
CRYAB	-0.979333	8.13527	-7.46081	4.93771e-12	5.82981e-10	16.9638	Down-Regulated
CYP4B1	-0.695819	7.44593	-7.43553	5.69538e-12	6.60639e-10	16.8256	Down-Regulated
SPON1	-0.695176	7.32862	-7.41378	6.43832e-12	7.37118e-10	16.7068	Down-Regulated
TLN1	-0.610352	9.62916	-7.38985	7.36655e-12	8.32578e-10	16.5764	Down-Regulated
CRABP2	-0.592997	6.86366	-7.32024	1.08879e-11	1.17532e-09	16.1981	Down-Regulated
LOC100132091	-0.955134	8.31026	-7.31456	1.124e-11	1.20174e-09	16.1672	Down-Regulated
GPR126	-0.687146	6.57965	-7.31157	1.14296e-11	1.21397e-09	16.1511	Down-Regulated
VCL	-0.850876	9.36225	-7.30495	1.18611e-11	1.24653e-09	16.1152	Down-Regulated
LAMA3	-0.687992	7.52553	-7.30335	1.1968e-11	1.25105e-09	16.1065	Down-Regulated
CHRDL1	-1.10215	9.14728	-7.29322	1.26652e-11	1.31356e-09	16.0517	Down-Regulated
GNAL	-0.600432	7.45917	-7.28753	1.30743e-11	1.35069e-09	16.0209	Down-Regulated
CCND2	-0.817977	9.29292	-7.28389	1.3343e-11	1.36776e-09	16.0012	Down-Regulated
LOC100127983	-0.626391	6.51304	-7.26758	1.46155e-11	1.46972e-09	15.913	Down-Regulated
RCAN2	-0.634489	8.15628	-7.26463	1.48581e-11	1.47726e-09	15.8971	Down-Regulated
KRT15	-1.1248	8.75974	-7.25198	1.59443e-11	1.57932e-09	15.8288	Down-Regulated
FLNC	-0.839178	9.09997	-7.25129	1.60056e-11	1.57948e-09	15.8251	Down-Regulated
SPTLC3	-0.585386	6.70667	-7.2373	1.73035e-11	1.69491e-09	15.7496	Down-Regulated
TPM1	-0.702959	10.4976	-7.21499	1.95919e-11	1.89797e-09	15.6294	Down-Regulated
KCNJ3	-0.91068	6.87058	-7.20149	2.11184e-11	2.01632e-09	15.5568	Down-Regulated
PTPLA	-0.606782	7.0582	-7.18054	2.37243e-11	2.24084e-09	15.4441	Down-Regulated
ATP2B4	-0.977019	9.41433	-7.15982	2.66131e-11	2.50475e-09	15.333	Down-Regulated
PGR	-0.620683	6.49442	-7.13159	3.11157e-11	2.88565e-09	15.1817	Down-Regulated
KRT13	-0.845491	8.68405	-7.13106	3.12056e-11	2.88565e-09	15.1789	Down-Regulated
TRPS1	-0.6558	7.96412	-7.12354	3.25305e-11	2.98727e-09	15.1387	Down-Regulated
KCNMB1	-0.720079	9.21242	-7.12159	3.28842e-11	3.0093e-09	15.1282	Down-Regulated
DDIT4	-0.679817	7.05111	-7.11968	3.32318e-11	3.02736e-09	15.118	Down-Regulated
MCAM	-0.684547	8.50795	-7.116	3.39157e-11	3.06133e-09	15.0983	Down-Regulated
LOC572558	-0.914934	8.30508	-7.10503	3.60335e-11	3.20868e-09	15.0397	Down-Regulated
PLP2	-0.666818	9.08377	-7.10297	3.64466e-11	3.23457e-09	15.0287	Down-Regulated
APCDD1	-0.609746	8.92433	-7.0988	3.7294e-11	3.28771e-09	15.0065	Down-Regulated
MYOF	-0.955015	8.91598	-7.09076	3.89863e-11	3.42548e-09	14.9635	Down-Regulated
ROBO1	-0.778729	8.31384	-7.06697	4.44461e-11	3.79182e-09	14.8367	Down-Regulated
TNS1	-0.884795	10.1251	-7.06602	4.46804e-11	3.79956e-09	14.8317	Down-Regulated
EDNRA	-0.892104	8.45653	-7.04008	5.15319e-11	4.31286e-09	14.6936	Down-Regulated
MYH11	-1.05158	11.2433	-7.02919	5.47101e-11	4.53251e-09	14.6358	Down-Regulated
TFCP2L1	-0.829471	8.28288	-7.01919	5.77985e-11	4.71978e-09	14.5827	Down-Regulated
TAGLN	-0.862633	11.0367	-6.98805	6.85549e-11	5.41216e-09	14.4176	Down-Regulated
PLCE1	-0.65539	7.00726	-6.97576	7.3327e-11	5.72067e-09	14.3525	Down-Regulated
ADRA1A	-0.641605	8.64872	-6.96597	7.73602e-11	5.99984e-09	14.3007	Down-Regulated
SLITRK6	-0.790022	5.85194	-6.96236	7.89001e-11	6.10138e-09	14.2817	Down-Regulated
RBPMS	-0.73672	9.05862	-6.95422	8.24906e-11	6.32357e-09	14.2386	Down-Regulated
ALDH1A2	-0.653516	8.08558	-6.94836	8.51731e-11	6.42041e-09	14.2077	Down-Regulated
MYLK	-0.749187	9.61828	-6.94828	8.52105e-11	6.42041e-09	14.2073	Down-Regulated
LOC642132	-0.802696	8.31907	-6.92343	9.75823e-11	7.29028e-09	14.0762	Down-Regulated
MID1	-0.699069	7.74527	-6.9133	1.03117e-10	7.59649e-09	14.0229	Down-Regulated
GPD1L	-0.736736	8.42295	-6.91122	1.04291e-10	7.66163e-09	14.0119	Down-Regulated
LOC732446	-0.785759	8.97654	-6.90718	1.06611e-10	7.77669e-09	13.9906	Down-Regulated
D4S234E	-0.631312	6.80325	-6.87094	1.29826e-10	9.18052e-09	13.8002	Down-Regulated
ACTN1	-0.593656	10.2075	-6.86346	1.35207e-10	9.53554e-09	13.761	Down-Regulated
LOC441734	-0.733256	9.24707	-6.79231	1.98709e-10	1.33382e-08	13.3889	Down-Regulated
THSD4	-0.648623	9.0016	-6.78955	2.01692e-10	1.34701e-08	13.3745	Down-Regulated
FHL1	-0.99642	8.86317	-6.78896	2.02327e-10	1.34784e-08	13.3714	Down-Regulated
GATM	-0.604694	6.65011	-6.78584	2.05763e-10	1.36729e-08	13.3551	Down-Regulated
LOC100127897	-0.628612	8.30297	-6.78188	2.10209e-10	1.39095e-08	13.3345	Down-Regulated
C15orf51	-0.631256	8.82916	-6.78173	2.10376e-10	1.39095e-08	13.3337	Down-Regulated
FLNA	-0.937214	11.1657	-6.77318	2.20304e-10	1.44935e-08	13.2892	Down-Regulated
TP63	-0.945847	7.94938	-6.7685	2.25932e-10	1.48269e-08	13.2648	Down-Regulated
SLC8A1	-0.780649	7.77868	-6.76597	2.29026e-10	1.49557e-08	13.2517	Down-Regulated
ITGB3	-0.661407	7.76888	-6.76307	2.32636e-10	1.5154e-08	13.2365	Down-Regulated
KRT5	-1.07019	10.0044	-6.76	2.36514e-10	1.53687e-08	13.2206	Down-Regulated
EVI1	-0.649321	6.65039	-6.75606	2.41585e-10	1.56598e-08	13.2001	Down-Regulated
NT5E	-0.594282	7.06898	-6.73351	2.72731e-10	1.74647e-08	13.0829	Down-Regulated
LOC100129846	-0.701416	9.29818	-6.70622	3.15743e-10	1.99772e-08	12.9415	Down-Regulated
ANXA6	-0.665058	8.92412	-6.69681	3.32082e-10	2.07626e-08	12.8927	Down-Regulated
KLHL13	-0.587393	7.10429	-6.69497	3.35355e-10	2.09178e-08	12.8833	Down-Regulated
MAOB	-0.917653	8.71337	-6.6812	3.61023e-10	2.22046e-08	12.812	Down-Regulated
ASS1	-0.599184	8.40685	-6.59975	5.57417e-10	3.16352e-08	12.3926	Down-Regulated
SNAI2	-0.732868	7.83533	-6.5982	5.62045e-10	3.17615e-08	12.3846	Down-Regulated
LOC100131438	-0.996331	10.4161	-6.56995	6.5298e-10	3.62802e-08	12.2399	Down-Regulated
FAM83B	-0.605247	7.05584	-6.56878	6.57033e-10	3.64288e-08	12.2339	Down-Regulated
CDC42EP3	-0.675534	9.17562	-6.56395	6.74088e-10	3.71736e-08	12.2092	Down-Regulated
LOC730200	-0.765068	5.76688	-6.5413	7.59975e-10	4.13894e-08	12.0934	Down-Regulated
LOC652891	-0.704696	7.15787	-6.4645	1.13945e-09	5.79519e-08	11.7026	Down-Regulated
MEIS1	-0.793653	8.55318	-6.43793	1.31003e-09	6.52475e-08	11.568	Down-Regulated
SORBS1	-0.929571	9.41154	-6.43117	1.35729e-09	6.72957e-08	11.5338	Down-Regulated
CSRP1	-0.859317	11.0028	-6.42875	1.37461e-09	6.79521e-08	11.5216	Down-Regulated
TMEM47	-0.676344	9.08283	-6.40936	1.52151e-09	7.439e-08	11.4237	Down-Regulated
LOC642587	-1.03192	9.11777	-6.40934	1.52172e-09	7.439e-08	11.4235	Down-Regulated
HEPH	-0.620996	7.08935	-6.39084	1.67623e-09	8.11928e-08	11.3303	Down-Regulated
LOC100133944	-0.970003	7.8026	-6.37356	1.83446e-09	8.83714e-08	11.2433	Down-Regulated
GJA1	-0.597543	7.10651	-6.35349	2.03669e-09	9.68781e-08	11.1425	Down-Regulated
PDLIM1	-0.626837	8.6703	-6.34476	2.13131e-09	1.00297e-07	11.0987	Down-Regulated
ANXA8L2	-0.610086	7.17503	-6.32633	2.34563e-09	1.09216e-07	11.0063	Down-Regulated
DPYSL3	-0.763817	9.3129	-6.30039	2.68351e-09	1.21525e-07	10.8766	Down-Regulated
ACSS3	-0.602684	7.42565	-6.29355	2.78033e-09	1.2548e-07	10.8424	Down-Regulated
CYP3A5	-0.920242	7.31557	-6.27918	2.99502e-09	1.338e-07	10.7708	Down-Regulated
SCNN1A	-0.784658	8.3779	-6.26577	3.2099e-09	1.41319e-07	10.704	Down-Regulated
MUC4	-0.749425	8.13387	-6.26568	3.21144e-09	1.41319e-07	10.7035	Down-Regulated
ANXA8	-0.608278	7.19557	-6.25135	3.45803e-09	1.50418e-07	10.6322	Down-Regulated
LOC100134188	-0.76539	7.99479	-6.24215	3.62609e-09	1.55807e-07	10.5865	Down-Regulated
ANXA8L1	-0.615319	7.15552	-6.20764	4.33095e-09	1.821e-07	10.4154	Down-Regulated
RBMS3	-0.596967	7.74058	-6.17861	5.02671e-09	2.06111e-07	10.2719	Down-Regulated
BDH2	-0.606683	6.82007	-6.15448	5.6876e-09	2.3e-07	10.1529	Down-Regulated
WFDC2	-0.598799	8.82293	-6.11584	6.92737e-09	2.73854e-07	9.96306	Down-Regulated
PLS3	-0.712792	7.75854	-6.11188	7.06883e-09	2.78198e-07	9.9436	Down-Regulated
TRPC4	-0.69462	6.64694	-6.10094	7.47357e-09	2.92387e-07	9.89	Down-Regulated
COCH	-0.677235	7.90381	-6.0965	7.64415e-09	2.98618e-07	9.86827	Down-Regulated
CAP2	-0.590385	8.32241	-6.0861	8.05929e-09	3.11614e-07	9.81737	Down-Regulated
NRP2	-0.609089	7.73285	-6.05222	9.57036e-09	3.61582e-07	9.65198	Down-Regulated
DKFZP564O0823	-0.699488	9.3795	-6.03251	1.05741e-08	3.94432e-07	9.55601	Down-Regulated
TIMP2	-0.733569	9.7944	-6.01498	1.15529e-08	4.26135e-07	9.47083	Down-Regulated
ID3	-0.646155	7.98749	-6.01157	1.17529e-08	4.32308e-07	9.45431	Down-Regulated
GPX2	-0.68038	6.39193	-5.99985	1.24682e-08	4.54196e-07	9.39747	Down-Regulated
TRPC1	-0.600387	6.61808	-5.99027	1.30845e-08	4.72727e-07	9.35107	Down-Regulated
ACTG2	-0.783582	11.7411	-5.99013	1.30939e-08	4.72727e-07	9.35037	Down-Regulated
ANXA2	-0.688913	9.5778	-5.982	1.36405e-08	4.88821e-07	9.31104	Down-Regulated
LOC100133706	-1.41325	10.3086	-5.95122	1.59207e-08	5.59169e-07	9.16237	Down-Regulated
LOC100133793	-1.44772	10.4694	-5.94475	1.64455e-08	5.73793e-07	9.13118	Down-Regulated
FCGBP	-0.773572	7.93598	-5.93692	1.71037e-08	5.92069e-07	9.09345	Down-Regulated
LOC652599	-1.05026	7.65607	-5.93079	1.7636e-08	6.08108e-07	9.06398	Down-Regulated
ACTA2	-0.693535	12.3468	-5.88155	2.25504e-08	7.62647e-07	8.82767	Down-Regulated
CYP4X1	-0.627405	7.18258	-5.82866	2.93241e-08	9.61153e-07	8.57526	Down-Regulated
MPZL2	-0.702919	9.26507	-5.82255	3.02235e-08	9.88035e-07	8.54624	Down-Regulated
FBXO32	-0.60012	8.99801	-5.8189	3.07752e-08	1.00359e-06	8.52886	Down-Regulated
LDHB	-0.776053	9.3698	-5.80745	3.25673e-08	1.05423e-06	8.47448	Down-Regulated
EFEMP1	-0.684969	8.52876	-5.77978	3.73314e-08	1.18809e-06	8.34335	Down-Regulated
CORO1C	-0.63947	9.20304	-5.76391	4.03656e-08	1.27089e-06	8.2683	Down-Regulated
CFL2	-0.688707	8.39678	-5.75317	4.25535e-08	1.33659e-06	8.21762	Down-Regulated
KRT19	-0.701498	9.35731	-5.69745	5.59103e-08	1.69479e-06	7.95555	Down-Regulated
MAP1B	-0.731306	8.56575	-5.68211	6.02555e-08	1.81294e-06	7.88372	Down-Regulated
C8orf84	-0.689523	8.1356	-5.66256	6.62752e-08	1.965e-06	7.79235	Down-Regulated
KCNMA1	-0.698046	8.67152	-5.6555	6.85928e-08	2.02238e-06	7.75937	Down-Regulated
LGALS3BP	-0.598452	9.17176	-5.62089	8.11378e-08	2.33499e-06	7.59824	Down-Regulated
GSTM4	-0.608198	8.82896	-5.61642	8.29127e-08	2.38088e-06	7.57749	Down-Regulated
PMP22	-0.676458	8.63069	-5.60575	8.73026e-08	2.4934e-06	7.52801	Down-Regulated
MPPED2	-0.840599	8.71686	-5.57682	1.00389e-07	2.81847e-06	7.39407	Down-Regulated
CES1	-0.703567	8.33603	-5.57288	1.02313e-07	2.86639e-06	7.37587	Down-Regulated
GSTM2	-0.692878	9.06115	-5.57078	1.03354e-07	2.88333e-06	7.36617	Down-Regulated
GSTA1	-0.826879	6.3625	-5.56636	1.05577e-07	2.93916e-06	7.34576	Down-Regulated
FAM55D	-0.8799	5.70341	-5.55856	1.09617e-07	3.02615e-06	7.30976	Down-Regulated
ATP1B1	-0.74556	8.22609	-5.55225	1.12993e-07	3.09672e-06	7.28069	Down-Regulated
SYT1	-0.733204	6.74584	-5.51336	1.36166e-07	3.66345e-06	7.1019	Down-Regulated
CNTN1	-0.761714	7.59768	-5.4608	1.74978e-07	4.60461e-06	6.86164	Down-Regulated
C21orf34	-0.746913	7.39215	-5.4598	1.75812e-07	4.61738e-06	6.85709	Down-Regulated
GSTA2	-0.748546	6.50953	-5.43178	2.00826e-07	5.15155e-06	6.7297	Down-Regulated
SLPI	-0.806318	7.66136	-5.40413	2.28913e-07	5.7589e-06	6.60438	Down-Regulated
UPK1A	-0.639043	7.05241	-5.39114	2.43384e-07	6.061e-06	6.5457	Down-Regulated
LOC652708	-0.668176	7.9391	-5.36136	2.80039e-07	6.83229e-06	6.41145	Down-Regulated
CD177	-0.934312	8.26253	-5.35664	2.86319e-07	6.95342e-06	6.39023	Down-Regulated
LOC100133842	-0.625337	9.42062	-5.32354	3.34395e-07	7.98892e-06	6.24174	Down-Regulated
GSTM5	-0.650796	8.30404	-5.31211	3.52771e-07	8.35839e-06	6.19058	Down-Regulated
ITGA5	-0.68295	9.33846	-5.27381	4.2175e-07	9.86208e-06	6.01981	Down-Regulated
ANO6	-0.64212	8.16389	-5.26511	4.39146e-07	1.02147e-05	5.98118	Down-Regulated
CALD1	-0.590545	9.93959	-5.23902	4.9567e-07	1.13399e-05	5.86545	Down-Regulated
CLSTN2	-0.8275	7.73652	-5.21753	5.4747e-07	1.23858e-05	5.77048	Down-Regulated
LOC100130904	-0.613285	7.722	-5.21203	5.61558e-07	1.26504e-05	5.7462	Down-Regulated
NEXN	-0.649168	6.98903	-5.17586	6.63365e-07	1.45957e-05	5.58707	Down-Regulated
SEMA3D	-0.70827	6.6567	-5.06805	1.08506e-06	2.25957e-05	5.11745	Down-Regulated
ATRNL1	-0.593932	6.69966	-5.06051	1.12276e-06	2.33074e-05	5.08488	Down-Regulated
C7orf58	-0.627095	7.62043	-5.02787	1.30119e-06	2.65529e-05	4.94425	Down-Regulated
FADS2	-0.898774	9.01395	-4.95984	1.76585e-06	3.4517e-05	4.65327	Down-Regulated
SERPINB11	-1.36384	6.5175	-4.90034	2.30114e-06	4.34081e-05	4.40117	Down-Regulated
FLRT3	-0.711252	7.2485	-4.88548	2.45762e-06	4.58151e-05	4.33856	Down-Regulated
FERMT2	-0.674067	8.61728	-4.86947	2.63781e-06	4.88531e-05	4.27124	Down-Regulated
PTGS1	-0.595333	7.33485	-4.81617	3.33433e-06	5.94225e-05	4.04839	Down-Regulated
GABRP	-0.712209	7.39048	-4.72217	5.01935e-06	8.466e-05	3.65979	Down-Regulated
ITGB6	-0.668531	6.7015	-4.71799	5.11094e-06	8.59853e-05	3.64263	Down-Regulated
SLC39A2	-0.6731	6.00928	-4.65146	6.80283e-06	0.000110513	3.37129	Down-Regulated
NEFH	-1.1205	10.3101	-4.58205	9.14055e-06	0.000142854	3.0913	Down-Regulated
PRUNE2	-0.627872	9.13244	-4.55535	1.02318e-05	0.000157509	2.98448	Down-Regulated
TGFB3	-0.613574	9.00231	-4.45063	1.58546e-05	0.000230388	2.57011	Down-Regulated
TGM4	-1.83198	8.47462	-4.43706	1.67719e-05	0.000241331	2.51695	Down-Regulated
LMO3	-0.625522	7.29174	-4.42706	1.74803e-05	0.000250028	2.47786	Down-Regulated
LOC100133135	-0.655683	10.5113	-4.4167	1.82445e-05	0.000258719	2.43743	Down-Regulated
SPARCL1	-0.591302	9.84259	-4.37032	2.20762e-05	0.000304246	2.25741	Down-Regulated
EDNRB	-0.667057	6.83842	-4.328	2.62388e-05	0.000348537	2.09442	Down-Regulated
ITGA8	-0.885211	7.80444	-4.30559	2.87372e-05	0.000375577	2.00865	Down-Regulated
ITGA1	-0.596725	8.54114	-4.27461	3.25712e-05	0.000418974	1.89061	Down-Regulated
KRT23	-0.591001	7.20739	-4.05132	7.87906e-05	0.00086392	1.06018	Down-Regulated
LSAMP	-0.595084	8.51097	-3.70177	0.000292983	0.0024947	-0.166245	Down-Regulated
PDE5A	-0.611385	7.96327	-3.67178	0.000326602	0.0027369	-0.267165	Down-Regulated
OLFM4	-1.12557	7.92409	-3.66286	0.000337286	0.00281306	-0.297053	Down-Regulated
LOC100134308	-0.618924	7.1516	-3.59897	0.000424019	0.00336446	-0.509308	Down-Regulated
LOC100133732	-0.674466	7.01582	-3.47903	0.000646326	0.00473554	-0.899147	Down-Regulated
SCUBE2	-0.644789	8.87114	-3.41977	0.000792858	0.00555757	-1.08756	Down-Regulated
LOC100133714	-0.698497	8.32667	-2.96731	0.00345907	0.0180402	-2.43245	Down-Regulated
MME	-0.647231	8.86176	-2.84124	0.00507071	0.0245434	-2.7769	Down-Regulated
LOC100130716	-0.674468	9.78921	-2.82649	0.00529849	0.0253995	-2.81632	Down-Regulated

## Sheet: MT-vs-PT.limma_Dif
Table S3-2. Differentially expressed genes in GSE21034 database identified by bioinformatics analysis.
row.names(tT)	logFC	AveExpr	t	P.Value	adj.P.Val	B	regulated
ANLN	1.04036	5.82425	12.024	7.86644e-24	1.22379e-20	43.4418	Up-Regulated
STMN1	0.684662	6.71636	11.8597	2.18091e-23	3.20437e-20	42.4476	Up-Regulated
TPX2	1.16708	6.22362	11.2003	1.29779e-21	1.22581e-18	38.4624	Up-Regulated
PBK	0.757632	5.01762	10.7448	2.16131e-20	1.68118e-17	35.7184	Up-Regulated
CENPF	0.898306	5.81973	10.7302	2.36513e-20	1.74772e-17	35.6305	Up-Regulated
RRM2	0.931384	7.09097	10.7292	2.37902e-20	1.74772e-17	35.6248	Up-Regulated
MKI67	1.02762	6.40813	10.62	4.65833e-20	3.24207e-17	34.9691	Up-Regulated
MCM4	0.722317	7.52974	10.536	7.80882e-20	5.29538e-17	34.4651	Up-Regulated
NUSAP1	0.803413	6.51929	10.3615	2.27834e-19	1.43465e-16	33.4203	Up-Regulated
FAM111B	0.967562	5.84242	10.3254	2.84335e-19	1.74879e-16	33.2041	Up-Regulated
RACGAP1	0.699879	6.59272	10.2082	5.82648e-19	3.50211e-16	32.5041	Up-Regulated
HN1	0.693938	8.39852	10.1756	7.11016e-19	4.08788e-16	32.3098	Up-Regulated
MELK	0.686144	5.47449	10.1069	1.08196e-18	5.96137e-16	31.9002	Up-Regulated
TOP2A	1.39825	5.90756	10.0993	1.13333e-18	6.11695e-16	31.8549	Up-Regulated
UBE2C	0.848484	6.83392	10.0065	1.99581e-18	1.05152e-15	31.3028	Up-Regulated
PRC1	0.700114	6.70136	10.0039	2.02773e-18	1.05152e-15	31.2873	Up-Regulated
DTL	0.749353	5.9462	9.99421	2.15047e-18	1.09372e-15	31.2299	Up-Regulated
MLF1IP	0.66466	5.25141	9.81577	6.36478e-18	2.95314e-15	30.1712	Up-Regulated
TYMS	0.740115	7.54761	9.79463	7.23637e-18	3.29966e-15	30.046	Up-Regulated
CCNA2	0.64573	6.66085	9.75392	9.26262e-18	4.15201e-15	29.8051	Up-Regulated
CIT	0.677299	6.66292	9.74777	9.61436e-18	4.23785e-15	29.7688	Up-Regulated
NCAPG	0.650971	5.69506	9.60878	2.22963e-17	9.21359e-15	28.9481	Up-Regulated
BUB1	0.724628	5.93798	9.59211	2.46591e-17	9.88121e-15	28.8498	Up-Regulated
DLGAP5	0.615407	5.43016	9.48496	4.70647e-17	1.83047e-14	28.2193	Up-Regulated
SPAG1	0.677143	5.99358	9.43843	6.22795e-17	2.31987e-14	27.946	Up-Regulated
HIST1H3B	1.49742	6.6702	9.23622	2.09591e-16	7.10649e-14	26.7623	Up-Regulated
KIF20A	0.662901	5.80814	9.22926	2.18513e-16	7.30031e-14	26.7217	Up-Regulated
CDC2	0.642506	4.94013	9.13748	3.78158e-16	1.16292e-13	26.1867	Up-Regulated
UBE2T	0.69909	6.35935	9.11426	4.34331e-16	1.32032e-13	26.0517	Up-Regulated
KIF4A	0.613866	6.22848	8.9623	1.07275e-15	3.05064e-13	25.1699	Up-Regulated
PLK1	0.611576	7.30861	8.82388	2.4352e-15	6.63955e-13	24.3706	Up-Regulated
EXO1	0.655303	5.91188	8.81718	2.53357e-15	6.81826e-13	24.332	Up-Regulated
SPAG5	0.658503	6.4758	8.75139	3.73535e-15	9.35831e-13	23.9535	Up-Regulated
FOXM1	0.691972	6.86215	8.72282	4.4201e-15	1.08239e-12	23.7894	Up-Regulated
ASF1B	0.683319	7.05948	8.63799	7.27852e-15	1.73419e-12	23.3033	Up-Regulated
EZH2	0.685665	6.85862	8.50231	1.61089e-14	3.52092e-12	22.529	Up-Regulated
KIAA0101	0.767411	5.54438	8.44512	2.24884e-14	4.72024e-12	22.2039	Up-Regulated
CCNE2	0.594126	5.33442	8.36351	3.61552e-14	7.09156e-12	21.7412	Up-Regulated
RFX6	0.717492	5.48718	8.35223	3.86023e-14	7.45193e-12	21.6774	Up-Regulated
CCNB1	0.696188	6.46268	8.30217	5.16064e-14	9.47801e-12	21.3946	Up-Regulated
ABCC5	0.658942	8.0128	8.22175	8.21621e-14	1.39291e-11	20.9416	Up-Regulated
LMNB1	0.723424	7.08628	8.20778	8.90609e-14	1.46298e-11	20.863	Up-Regulated
TTK	0.591654	5.12207	7.99965	2.94313e-13	4.2074e-11	19.699	Up-Regulated
SRD5A1	0.5854	6.98588	7.96701	3.54605e-13	5.01511e-11	19.5176	Up-Regulated
LOC646890	0.965244	7.99248	7.70718	1.54725e-12	1.81867e-10	18.0839	Up-Regulated
AIDA	1.03315	8.0792	7.66339	1.97947e-12	2.19962e-10	17.8442	Up-Regulated
LOC646050	1.01499	7.93502	7.63911	2.26867e-12	2.49997e-10	17.7116	Up-Regulated
ARHGAP11B	0.637457	5.72674	7.63424	2.33146e-12	2.55851e-10	17.685	Up-Regulated
HIST2H3A	1.07918	7.16394	7.5492	3.75284e-12	3.84488e-10	17.222	Up-Regulated
HIST2H3C	1.07918	7.16394	7.5492	3.75284e-12	3.84488e-10	17.222	Up-Regulated
LOC653631	1.03005	8.33293	7.54791	3.77989e-12	3.84488e-10	17.2151	Up-Regulated
APLN	0.674678	7.36175	7.54008	3.94891e-12	4.00141e-10	17.1725	Up-Regulated
FAM72A	0.766753	5.91914	7.52744	4.23743e-12	4.22895e-10	17.104	Up-Regulated
KNTC1	0.689952	6.09229	7.27456	1.71842e-11	1.54058e-09	15.7431	Up-Regulated
HIST2H3D	1.1157	7.2728	7.21896	2.33117e-11	2.04147e-09	15.4469	Up-Regulated
TLCD1	0.601784	7.12142	7.13263	3.73504e-11	3.14588e-09	14.989	Up-Regulated
HIST1H1B	0.677276	5.8517	6.99638	7.81737e-11	6.13489e-09	14.272	Up-Regulated
AR	1.0236	9.63726	6.92671	1.13745e-10	8.54603e-09	13.908	Up-Regulated
ESM1	0.632834	6.2606	6.9009	1.30644e-10	9.62434e-09	13.7736	Up-Regulated
SSTR1	0.623642	7.68963	6.75057	2.9119e-10	1.94472e-08	12.9963	Up-Regulated
NVL	0.721758	7.89344	6.63519	5.355e-10	3.43747e-08	12.4058	Up-Regulated
HIST1H2BM	0.883483	7.49964	6.6037	6.31781e-10	3.96881e-08	12.2456	Up-Regulated
HBA1	1.11187	9.20299	6.5616	7.87559e-10	4.87789e-08	12.0321	Up-Regulated
HBA2	1.11187	9.20299	6.5616	7.87559e-10	4.87789e-08	12.0321	Up-Regulated
LOC728860	0.690803	7.73642	6.54444	8.61429e-10	5.24936e-08	11.9453	Up-Regulated
KHDRBS3	0.7655	7.92285	6.53144	9.21866e-10	5.55367e-08	11.8796	Up-Regulated
KPNA2	0.692214	7.83438	6.50715	1.04619e-09	6.16227e-08	11.7571	Up-Regulated
PLCH1	0.598139	6.09646	6.49029	1.14209e-09	6.60574e-08	11.6722	Up-Regulated
MTERFD1	0.594352	6.40912	6.42527	1.59979e-09	8.63464e-08	11.3459	Up-Regulated
HBB	1.20646	7.42304	6.42026	1.64171e-09	8.82485e-08	11.3209	Up-Regulated
SNORD30	0.924425	7.71468	6.18658	5.42721e-09	2.4897e-07	10.1644	Up-Regulated
LOC649917	0.716377	8.53557	6.1374	6.95822e-09	3.07219e-07	9.92423	Up-Regulated
XPO6	0.678992	9.33362	6.11208	7.9047e-09	3.44408e-07	9.80101	Up-Regulated
C5orf30	0.654431	6.95643	6.012	1.30478e-08	5.3007e-07	9.31702	Up-Regulated
MPHOSPH9	0.62668	6.60533	6.00448	1.3546e-08	5.47785e-07	9.28085	Up-Regulated
LOC100130787	0.649719	7.82132	5.99503	1.41984e-08	5.71543e-07	9.23545	Up-Regulated
CYFIP2	0.629722	8.05935	5.99307	1.4338e-08	5.75413e-07	9.226	Up-Regulated
EEF1A2	0.810765	8.17662	5.98951	1.45939e-08	5.83909e-07	9.20893	Up-Regulated
ONECUT2	0.605842	6.4416	5.98252	1.51098e-08	5.98216e-07	9.1754	Up-Regulated
NRP1	0.973531	8.90883	5.94747	1.79804e-08	6.99959e-07	9.00753	Up-Regulated
TMSB10	0.693142	10.7167	5.82764	3.24406e-08	1.15472e-06	8.43834	Up-Regulated
LOC100134241	0.692388	10.4592	5.82198	3.33524e-08	1.18082e-06	8.41162	Up-Regulated
LOC100134282	0.692388	10.4592	5.82198	3.33524e-08	1.18082e-06	8.41162	Up-Regulated
LOC100134401	0.692388	10.4592	5.82198	3.33524e-08	1.18082e-06	8.41162	Up-Regulated
ABCA12	0.716807	5.56474	5.71315	5.66362e-08	1.87937e-06	7.90136	Up-Regulated
LOC100130154	0.741078	10.7485	5.69218	6.26794e-08	2.04652e-06	7.80372	Up-Regulated
LOC85389	1.249	6.96311	5.68075	6.62326e-08	2.14927e-06	7.75062	Up-Regulated
GRIN3A	1.00851	6.3126	5.64786	7.75953e-08	2.47248e-06	7.59818	Up-Regulated
LOC85391	1.45257	7.90564	5.63335	8.31947e-08	2.63503e-06	7.53111	Up-Regulated
HIST1H3I	0.822588	7.4295	5.60202	9.66648e-08	3.01473e-06	7.38668	Up-Regulated
SERPINI1	0.726274	5.99706	5.5388	1.30655e-07	3.95359e-06	7.09682	Up-Regulated
HIST1H3H	0.676193	6.45547	5.53744	1.31505e-07	3.96887e-06	7.09058	Up-Regulated
DNAH8	1.07948	5.85009	5.43422	2.14093e-07	5.98532e-06	6.6221	Up-Regulated
NETO2	0.635889	6.64042	5.39525	2.56957e-07	7.04951e-06	6.4468	Up-Regulated
AKR1C3	0.82918	6.59192	5.39298	2.59696e-07	7.10258e-06	6.43661	Up-Regulated
KLK12	0.757449	7.22489	5.386	2.68306e-07	7.30782e-06	6.40529	Up-Regulated
HOXC6	0.846147	7.55447	5.37596	2.8118e-07	7.62705e-06	6.36028	Up-Regulated
SLC17A4	0.729974	6.05677	5.37472	2.82806e-07	7.65544e-06	6.35475	Up-Regulated
LOC85390	1.20098	7.13589	5.31361	3.75647e-07	9.75908e-06	6.08224	Up-Regulated
SNORA5A	0.640627	7.66105	5.24963	5.04576e-07	1.25892e-05	5.79918	Up-Regulated
TRIM48	0.686551	6.23335	5.21636	5.87717e-07	1.42731e-05	5.65294	Up-Regulated
LOC100131721	0.699963	6.58738	5.18131	6.89731e-07	1.62145e-05	5.49954	Up-Regulated
ART4	0.724606	5.70455	5.15086	7.92172e-07	1.81705e-05	5.36687	Up-Regulated
GLYATL2	0.676383	5.59104	5.11486	9.3244e-07	2.08631e-05	5.21074	Up-Regulated
LOC100131392	0.702032	6.20936	5.09056	1.04046e-06	2.26292e-05	5.1058	Up-Regulated
LOC729384	0.702032	6.20936	5.09056	1.04046e-06	2.26292e-05	5.1058	Up-Regulated
CADPS	0.959242	6.83268	5.03649	1.32631e-06	2.76797e-05	4.87352	Up-Regulated
HSPD1P1	0.587055	8.672	4.98689	1.65469e-06	3.33364e-05	4.66198	Up-Regulated
LOC100134006	0.687703	6.31869	4.97388	1.75308e-06	3.47033e-05	4.60676	Up-Regulated
LOC399939	0.687703	6.31869	4.97388	1.75308e-06	3.47033e-05	4.60676	Up-Regulated
TMEM45B	0.977207	8.71411	4.97293	1.76047e-06	3.48236e-05	4.60274	Up-Regulated
CRIP2	0.590875	8.84124	4.96419	1.83005e-06	3.59312e-05	4.56569	Up-Regulated
LRRC7	0.820869	6.23187	4.90758	2.34975e-06	4.40112e-05	4.32687	Up-Regulated
ABCC11	0.828045	6.8036	4.90304	2.39715e-06	4.4646e-05	4.3078	Up-Regulated
HSPD1	0.587123	9.12927	4.80535	3.6725e-06	6.411e-05	3.90068	Up-Regulated
LOC728160	0.796013	5.54292	4.80076	3.74636e-06	6.50131e-05	3.88169	Up-Regulated
UGT2B15	0.796013	5.54292	4.80076	3.74636e-06	6.50131e-05	3.88169	Up-Regulated
GMNN	0.629922	6.8983	4.78281	4.04915e-06	6.92677e-05	3.80758	Up-Regulated
SNORD26	0.837189	9.17704	4.76475	4.37763e-06	7.39305e-05	3.73323	Up-Regulated
COL1A1	0.734111	9.76186	4.72398	5.21675e-06	8.54287e-05	3.56613	Up-Regulated
LOC100131965	0.592142	7.99871	4.71961	5.3154e-06	8.6722e-05	3.54828	Up-Regulated
UGT2B17	0.773286	5.52573	4.71055	5.52564e-06	8.95994e-05	3.51133	Up-Regulated
LOC100129030	0.592675	7.97017	4.65532	6.99275e-06	0.000109495	3.28716	Up-Regulated
LOC100134253	0.721684	8.23476	4.61105	8.43422e-06	0.000126811	3.10887	Up-Regulated
SLC44A5	0.876952	6.14825	4.60585	8.62099e-06	0.000129354	3.08804	Up-Regulated
C12orf27	0.873381	6.85934	4.60564	8.62871e-06	0.000129367	3.08719	Up-Regulated
PPFIA2	1.03515	6.56698	4.56386	1.02851e-05	0.000150615	2.92028	Up-Regulated
SPP1	0.961992	7.3144	4.56078	1.04188e-05	0.000152103	2.908	Up-Regulated
SCGN	0.709322	6.43365	4.5144	1.26436e-05	0.000179199	2.72418	Up-Regulated
VWA5B1	0.592642	6.92042	4.51404	1.26628e-05	0.000179279	2.72274	Up-Regulated
LOC100131364	0.589507	7.85542	4.46208	1.57035e-05	0.000216083	2.51849	Up-Regulated
LOC100130131	0.602136	7.96819	4.46005	1.58354e-05	0.000217671	2.51056	Up-Regulated
AK5	0.647496	6.197	4.44545	1.68172e-05	0.000229142	2.45351	Up-Regulated
LOC100133690	0.641494	6.85981	4.39296	2.08539e-05	0.000276175	2.24959	Up-Regulated
LOC728744	0.589395	6.25337	4.37028	2.28729e-05	0.000296966	2.16205	Up-Regulated
LOC100133118	0.608517	7.56262	4.27693	3.334e-05	0.000408983	1.80552	Up-Regulated
PTPRT	0.691014	7.54057	4.26048	3.56091e-05	0.000433336	1.74328	Up-Regulated
SNHG1	0.588183	8.41727	4.11692	6.27633e-05	0.000699494	1.20844	Up-Regulated
CYP4X1	0.620872	7.1475	4.08477	7.11235e-05	0.000777917	1.09065	Up-Regulated
LOC100133199	0.625603	8.89656	4.05705	7.91765e-05	0.000851212	0.98969	Up-Regulated
LOC729189	0.617143	6.28469	4.05156	8.08724e-05	0.000866626	0.969749	Up-Regulated
HIST1H3C	0.765938	6.2435	4.027	8.88874e-05	0.00093882	0.880864	Up-Regulated
HIST1H4J	0.590394	7.0811	3.834	0.000184137	0.00171837	0.197588	Up-Regulated
SNORD25	0.627186	5.66396	3.79852	0.000209929	0.00191384	0.0749647	Up-Regulated
SLC36A1	0.682955	8.97628	3.79299	0.000214249	0.00194783	0.055919	Up-Regulated
HIST1H4K	0.770783	8.17967	3.78499	0.000220643	0.00199635	0.0284325	Up-Regulated
F5	0.969352	6.94787	3.69504	0.000306141	0.00260218	-0.277282	Up-Regulated
SNORD31	0.678637	6.04055	3.63798	0.000375723	0.00309363	-0.468058	Up-Regulated
CACNA1D	0.91695	8.9819	3.54236	0.000526807	0.00409537	-0.782155	Up-Regulated
LOC728027	0.794544	5.71011	3.52979	0.000550473	0.00424442	-0.822923	Up-Regulated
SLC10A5	0.695526	6.02175	3.4836	0.000646286	0.00483244	-0.971646	Up-Regulated
SNORD49A	0.586557	5.48066	3.47318	0.000669982	0.00497445	-1.00499	Up-Regulated
ATP8A2	0.770613	6.763	3.3845	0.000907168	0.00639101	-1.28514	Up-Regulated
LRRN1	0.711769	7.83377	3.26749	0.00134125	0.00876915	-1.64522	Up-Regulated
MYO6	0.642307	8.99874	3.26279	0.00136222	0.00887136	-1.65948	Up-Regulated
LOC100130019	0.588506	7.51897	3.1454	0.00199527	0.0119549	-2.00923	Up-Regulated
LOC100131111	0.588506	7.51897	3.1454	0.00199527	0.0119549	-2.00923	Up-Regulated
LOC100131867	0.588506	7.51897	3.1454	0.00199527	0.0119549	-2.00923	Up-Regulated
SNORD78	0.659826	8.0396	2.86985	0.00469159	0.0232444	-2.78575	Up-Regulated
SNORD28	0.678917	5.63033	2.72626	0.00715778	0.0322545	-3.16512	Up-Regulated
GPR116	0.630444	7.02799	2.61604	0.00979204	0.0409698	-3.44436	Up-Regulated
ACTG2	-3.96493	11.0968	-24.9992	9.60106e-56	2.53919e-51	114.132	Down-Regulated
MYH11	-3.78292	10.5735	-20.8981	1.45376e-46	1.92238e-42	94.0677	Down-Regulated
CNN1	-2.79616	9.53942	-17.9589	2.01315e-39	1.77472e-35	78.2797	Down-Regulated
ACTA2	-2.61245	11.8902	-16.8886	1.03801e-36	6.86306e-33	72.2503	Down-Regulated
TAGLN	-2.49641	10.5641	-16.4015	1.85672e-35	9.82096e-32	69.4606	Down-Regulated
MYL9	-1.80461	10.3585	-14.4001	3.30271e-30	1.45578e-26	57.736	Down-Regulated
LOC729468	-2.75129	9.65396	-13.9961	3.93954e-29	1.48841e-25	55.3263	Down-Regulated
PCP4	-2.31816	8.6691	-13.6273	3.81878e-28	1.26244e-24	53.1168	Down-Regulated
SORBS1	-2.24347	8.95889	-13.3394	2.25923e-27	6.63888e-24	51.3868	Down-Regulated
DES	-1.7908	10.1232	-13.3102	2.7062e-27	7.15709e-24	51.2111	Down-Regulated
SYNM	-1.81395	9.43476	-13.0856	1.08677e-26	2.61288e-23	49.8576	Down-Regulated
PGM5	-2.11815	8.6686	-12.9047	3.33202e-26	7.34349e-23	48.7665	Down-Regulated
MEIS2	-1.94217	8.03832	-12.8265	5.41111e-26	1.10083e-22	48.2942	Down-Regulated
MYLK	-1.65542	9.2728	-12.8022	6.28827e-26	1.1879e-22	48.1479	Down-Regulated
CHRDL1	-2.2994	8.65625	-12.7447	8.98047e-26	1.58338e-22	47.8007	Down-Regulated
CSRP1	-2.06863	10.585	-12.4409	5.91474e-25	9.7767e-22	45.9641	Down-Regulated
LMOD1	-1.58753	8.94377	-11.7962	3.23366e-23	4.50108e-20	42.0635	Down-Regulated
PGM5P2	-1.5442	8.75669	-11.7139	5.3857e-23	7.12178e-20	41.5661	Down-Regulated
TNS1	-1.72907	9.74573	-11.6627	7.39887e-23	9.31799e-20	41.2564	Down-Regulated
LOC100131438	-2.13115	9.96559	-11.6229	9.4734e-23	1.13883e-19	41.0153	Down-Regulated
FLNA	-1.98355	10.7445	-11.5188	1.80573e-22	2.07635e-19	40.3862	Down-Regulated
MEIS1	-1.65488	8.19971	-11.4853	2.22289e-22	2.44953e-19	40.1835	Down-Regulated
FHL1	-1.90634	8.4411	-11.342	5.39871e-22	5.71118e-19	39.318	Down-Regulated
ALDH1A2	-1.32129	7.79977	-11.3291	5.85104e-22	5.95164e-19	39.2395	Down-Regulated
PDE5A	-2.15317	7.57973	-11.2528	9.38023e-22	9.18811e-19	38.7791	Down-Regulated
TPM2	-1.5547	9.31166	-11.1709	1.55736e-21	1.42026e-18	38.2846	Down-Regulated
CNTN1	-1.7756	7.23471	-11.0938	2.50852e-21	2.17151e-18	37.8195	Down-Regulated
SPARCL1	-1.89816	9.49498	-11.0914	2.54534e-21	2.17151e-18	37.8053	Down-Regulated
AZGP1	-2.18817	11.1082	-11.0229	3.88684e-21	3.21235e-18	37.3923	Down-Regulated
SPOCK3	-1.50955	7.45966	-10.7793	1.74755e-20	1.40053e-17	35.9258	Down-Regulated
TPM1	-1.34913	10.1993	-10.6462	3.96534e-20	2.83436e-17	35.1263	Down-Regulated
SH3BGRL	-1.58229	9.12877	-10.4472	1.34733e-19	8.90822e-17	33.9329	Down-Regulated
MYOCD	-1.45753	7.57177	-10.4376	1.42865e-19	9.21548e-17	33.8757	Down-Regulated
CALD1	-1.3695	9.65908	-10.1884	6.57664e-19	3.86516e-16	32.3859	Down-Regulated
SPG20	-1.30699	7.14546	-10.1524	8.19336e-19	4.61042e-16	32.1715	Down-Regulated
MSMB	-3.16962	11.5171	-9.89713	3.88273e-18	1.9016e-15	30.6534	Down-Regulated
KCNMB1	-1.24671	8.92399	-9.8838	4.21047e-18	2.02462e-15	30.5744	Down-Regulated
TCF21	-1.2821	7.84082	-9.87112	4.54778e-18	2.14777e-15	30.4992	Down-Regulated
NEXN	-1.32086	6.70406	-9.6646	1.59096e-17	6.89774e-15	29.2774	Down-Regulated
LOC100134430	-1.12389	8.98289	-9.64645	1.77556e-17	7.57392e-15	29.1703	Down-Regulated
FLNC	-1.26048	8.78821	-9.61674	2.125e-17	8.92062e-15	28.995	Down-Regulated
MKX	-0.84092	7.71508	-9.44916	5.83862e-17	2.20591e-14	28.009	Down-Regulated
RIC3	-0.84618	7.26956	-9.39512	8.08108e-17	2.92767e-14	27.6919	Down-Regulated
TRPC4	-1.20278	6.36869	-9.24063	2.04136e-16	7.01142e-14	26.788	Down-Regulated
ACPP	-1.84862	11.725	-9.22638	2.22311e-16	7.30031e-14	26.7048	Down-Regulated
PALLD	-0.947978	7.83898	-9.22542	2.23589e-16	7.30031e-14	26.6993	Down-Regulated
SRD5A2	-1.15821	7.73285	-9.20869	2.47117e-16	7.97014e-14	26.6017	Down-Regulated
ILK	-0.861065	9.4141	-9.20463	2.53196e-16	8.0678e-14	26.578	Down-Regulated
ANXA3	-1.37374	8.14403	-9.18247	2.89055e-16	9.10077e-14	26.4488	Down-Regulated
PI15	-2.58791	8.4283	-9.13904	3.74646e-16	1.16292e-13	26.1958	Down-Regulated
EDNRA	-1.36032	8.12253	-9.08545	5.15739e-16	1.53256e-13	25.8841	Down-Regulated
SLC8A1	-1.2382	7.48035	-9.06252	5.91188e-16	1.73724e-13	25.751	Down-Regulated
MSRB3	-0.894254	9.03904	-8.88162	1.73072e-15	4.86939e-13	24.7036	Down-Regulated
LOC652708	-1.35234	7.6467	-8.87971	1.75036e-15	4.87281e-13	24.6926	Down-Regulated
TGFBR3	-1.09095	8.38384	-8.82473	2.42304e-15	6.63955e-13	24.3755	Down-Regulated
FERMT2	-1.44235	8.31241	-8.78306	3.09898e-15	8.11471e-13	24.1356	Down-Regulated
MOXD1	-1.34714	7.54846	-8.77942	3.16629e-15	8.2097e-13	24.1147	Down-Regulated
CES1	-1.34127	8.03862	-8.77227	3.30269e-15	8.43927e-13	24.0735	Down-Regulated
ACTN1	-0.939695	9.9809	-8.77145	3.31865e-15	8.43927e-13	24.0688	Down-Regulated
FBXO32	-1.09216	8.75089	-8.72497	4.36449e-15	1.07876e-12	23.8018	Down-Regulated
DPP4	-2.45824	9.25354	-8.71606	4.59964e-15	1.11603e-12	23.7506	Down-Regulated
DPYSL3	-1.28088	9.01221	-8.64946	6.80458e-15	1.63601e-12	23.3689	Down-Regulated
GNAL	-0.839665	7.24399	-8.62932	7.65829e-15	1.80838e-12	23.2537	Down-Regulated
MYBPC1	-2.35515	9.45288	-8.6045	8.85838e-15	2.07325e-12	23.1118	Down-Regulated
DDR2	-1.15038	8.3766	-8.59584	9.32003e-15	2.16217e-12	23.0623	Down-Regulated
MRVI1	-0.698737	9.06095	-8.58081	1.01782e-14	2.32863e-12	22.9764	Down-Regulated
LOC392264	-0.828654	8.89345	-8.58021	1.02137e-14	2.32863e-12	22.973	Down-Regulated
SSPN	-0.663689	8.54567	-8.57576	1.04835e-14	2.34963e-12	22.9476	Down-Regulated
EYA4	-0.873774	6.53173	-8.54946	1.22286e-14	2.71773e-12	22.7976	Down-Regulated
RBPMS	-1.13859	8.78087	-8.49184	1.71252e-14	3.71237e-12	22.4694	Down-Regulated
VPS36	-0.908762	8.3729	-8.46471	2.00617e-14	4.31358e-12	22.3152	Down-Regulated
ZNF532	-1.19052	9.12974	-8.459	2.07416e-14	4.41213e-12	22.2827	Down-Regulated
ADH5	-1.04717	9.07534	-8.45807	2.08536e-14	4.41213e-12	22.2774	Down-Regulated
PDGFC	-1.05574	7.58338	-8.4427	2.28087e-14	4.74978e-12	22.1901	Down-Regulated
SLC14A1	-2.04171	9.05616	-8.42613	2.512e-14	5.19023e-12	22.0961	Down-Regulated
LOC100134201	-1.08485	8.73871	-8.41692	2.6503e-14	5.39173e-12	22.0438	Down-Regulated
ELF1	-0.887957	8.97222	-8.40004	2.92386e-14	5.90285e-12	21.9481	Down-Regulated
CCND2	-1.28906	8.98138	-8.39196	3.06445e-14	6.1398e-12	21.9024	Down-Regulated
PLN	-1.04919	6.07648	-8.37029	3.47592e-14	6.91186e-12	21.7796	Down-Regulated
LOC732436	-1.19234	8.06228	-8.35608	3.77494e-14	7.34087e-12	21.6992	Down-Regulated
C9orf61	-1.2149	8.88543	-8.3232	4.5682e-14	8.6369e-12	21.5134	Down-Regulated
ZBTB20	-1.05941	8.6778	-8.32306	4.57203e-14	8.6369e-12	21.5126	Down-Regulated
LRCH2	-1.07764	6.69589	-8.31727	4.72816e-14	8.80603e-12	21.4799	Down-Regulated
ATP2B4	-1.40545	9.05923	-8.31588	4.76631e-14	8.81502e-12	21.472	Down-Regulated
FBLN1	-1.30649	9.52632	-8.29908	5.2536e-14	9.5822e-12	21.3772	Down-Regulated
CRISPLD2	-0.779511	10.6329	-8.28896	5.57087e-14	1.00913e-11	21.3201	Down-Regulated
MFAP4	-1.14222	7.95946	-8.28731	5.62423e-14	1.01186e-11	21.3108	Down-Regulated
PTPLA	-0.790388	6.84811	-8.28403	5.73196e-14	1.02428e-11	21.2923	Down-Regulated
PTGER2	-1.05758	7.20647	-8.26487	6.40401e-14	1.12911e-11	21.1843	Down-Regulated
SOCS2	-1.02262	8.61069	-8.25834	6.65047e-14	1.1648e-11	21.1475	Down-Regulated
PDZRN4	-0.736824	6.28321	-8.25219	6.89138e-14	1.19905e-11	21.1129	Down-Regulated
VWA5A	-0.872557	6.94853	-8.24519	7.17607e-14	1.24043e-11	21.0734	Down-Regulated
SCN7A	-1.42478	6.48403	-8.2399	7.39874e-14	1.27061e-11	21.0437	Down-Regulated
LPHN2	-1.47315	8.66375	-8.23111	7.78389e-14	1.32813e-11	20.9942	Down-Regulated
LOC653852	-0.742779	8.25593	-8.21798	8.39697e-14	1.41449e-11	20.9204	Down-Regulated
SATB1	-1.36789	8.85162	-8.21463	8.56118e-14	1.43302e-11	20.9015	Down-Regulated
PAMR1	-0.915998	7.65674	-8.2116	8.71213e-14	1.44912e-11	20.8845	Down-Regulated
TSHZ2	-0.715672	8.23923	-8.19651	9.50434e-14	1.55161e-11	20.7997	Down-Regulated
EPHA3	-0.849965	8.99475	-8.16058	1.16907e-13	1.89683e-11	20.5981	Down-Regulated
VCL	-1.15398	9.06186	-8.15515	1.20621e-13	1.94516e-11	20.5676	Down-Regulated
MXRA5	-0.599188	7.8158	-8.15386	1.21518e-13	1.94775e-11	20.5604	Down-Regulated
HLF	-0.932423	7.73231	-8.14707	1.26363e-13	2.01321e-11	20.5223	Down-Regulated
ACADL	-1.75334	7.94291	-8.13665	1.3417e-13	2.12479e-11	20.4639	Down-Regulated
GSTM2	-1.21609	8.78153	-8.13545	1.35097e-13	2.12672e-11	20.4572	Down-Regulated
SFRP1	-0.981938	8.33904	-8.12808	1.40952e-13	2.1928e-11	20.4159	Down-Regulated
ADH5P4	-0.906779	8.57257	-8.12316	1.44991e-13	2.24245e-11	20.3884	Down-Regulated
MGP	-1.53122	9.28079	-8.11411	1.52734e-13	2.34846e-11	20.3377	Down-Regulated
CRYAB	-1.34069	7.78795	-8.1035	1.62327e-13	2.48154e-11	20.2784	Down-Regulated
ARHGAP10	-0.838099	7.90693	-8.07735	1.88623e-13	2.8571e-11	20.1322	Down-Regulated
EYA1	-1.21932	7.53207	-8.07695	1.89054e-13	2.8571e-11	20.13	Down-Regulated
LOC283904	-0.996839	7.74665	-8.06585	2.01477e-13	3.02754e-11	20.068	Down-Regulated
STAT6	-0.682756	9.43995	-8.05967	2.08748e-13	3.11907e-11	20.0335	Down-Regulated
SMAD9	-0.875484	8.82352	-8.04984	2.20833e-13	3.2811e-11	19.9787	Down-Regulated
FGFR2	-1.15905	7.77275	-8.04826	2.22848e-13	3.29254e-11	19.9699	Down-Regulated
RNF180	-0.714809	7.79084	-8.04361	2.28865e-13	3.36266e-11	19.9439	Down-Regulated
SELP	-0.765538	7.2139	-8.03066	2.46472e-13	3.60135e-11	19.8718	Down-Regulated
AOC3	-0.796816	8.19615	-8.02875	2.49187e-13	3.62101e-11	19.8611	Down-Regulated
SYNE1	-0.828347	7.69975	-8.02395	2.56129e-13	3.70156e-11	19.8343	Down-Regulated
LOC100132655	-1.12603	8.50512	-7.97896	3.31235e-13	4.70976e-11	19.584	Down-Regulated
WFDC1	-0.813608	8.56842	-7.96603	3.5661e-13	5.01662e-11	19.5121	Down-Regulated
FRMD6	-0.949938	7.30779	-7.95983	3.6944e-13	5.16962e-11	19.4777	Down-Regulated
SERPING1	-1.15366	9.26387	-7.94325	4.06083e-13	5.59358e-11	19.3857	Down-Regulated
FAM3B	-2.10107	9.03114	-7.93812	4.18117e-13	5.7295e-11	19.3572	Down-Regulated
KCND3	-0.644955	8.14036	-7.93489	4.25903e-13	5.80611e-11	19.3393	Down-Regulated
GSTM5	-1.13794	8.04194	-7.9302	4.37419e-13	5.92247e-11	19.3133	Down-Regulated
BOC	-0.659729	8.00814	-7.92878	4.40968e-13	5.92247e-11	19.3054	Down-Regulated
DKFZP564O0823	-1.22815	9.09715	-7.92527	4.49874e-13	6.009e-11	19.286	Down-Regulated
LOC100132091	-1.26884	7.97642	-7.92144	4.59811e-13	6.11086e-11	19.2647	Down-Regulated
QSER1	-0.897651	7.20763	-7.90526	5.04145e-13	6.60672e-11	19.1751	Down-Regulated
NEBL	-0.779637	7.81739	-7.89287	5.40951e-13	7.00677e-11	19.1065	Down-Regulated
XBP1	-0.915543	11.1624	-7.89217	5.4312e-13	7.00677e-11	19.1026	Down-Regulated
C21orf63	-0.81911	7.91535	-7.86894	6.1978e-13	7.95696e-11	18.9741	Down-Regulated
LOC100133843	-1.09773	9.31234	-7.86109	6.48001e-13	8.27908e-11	18.9308	Down-Regulated
PARVA	-0.753302	9.3836	-7.86011	6.51619e-13	8.28527e-11	18.9254	Down-Regulated
RNASE4	-1.14996	7.9753	-7.8545	6.72705e-13	8.51246e-11	18.8944	Down-Regulated
LOC572558	-1.25165	7.98071	-7.84907	6.93757e-13	8.72263e-11	18.8644	Down-Regulated
ANO7	-1.22053	9.54378	-7.84102	7.26164e-13	9.0589e-11	18.8199	Down-Regulated
CDC42EP3	-0.986316	8.92824	-7.83778	7.39658e-13	9.18392e-11	18.802	Down-Regulated
FOXN3	-0.706424	8.75715	-7.77583	1.05036e-12	1.28606e-10	18.4607	Down-Regulated
PAK1IP1	-1.31332	8.34524	-7.74321	1.26283e-12	1.52502e-10	18.2815	Down-Regulated
ALDH3A2	-0.852164	9.19806	-7.73396	1.33052e-12	1.58506e-10	18.2307	Down-Regulated
GSTM1L	-1.03218	9.02998	-7.72015	1.43824e-12	1.69808e-10	18.1549	Down-Regulated
ALDH1A3	-1.2121	10.6884	-7.70518	1.56477e-12	1.83113e-10	18.0729	Down-Regulated
PGR	-0.762946	6.28528	-7.70328	1.58162e-12	1.84269e-10	18.0625	Down-Regulated
ANTXR2	-1.32924	9.79277	-7.69576	1.65e-12	1.91393e-10	18.0213	Down-Regulated
CPA3	-1.11311	6.95942	-7.68838	1.72001e-12	1.96074e-10	17.9809	Down-Regulated
MATN2	-0.927363	8.70446	-7.68748	1.7287e-12	1.96219e-10	17.976	Down-Regulated
PCDH18	-1.14371	7.31419	-7.67849	1.81836e-12	2.04639e-10	17.9268	Down-Regulated
PRKCH	-0.642626	8.40334	-7.67492	1.85532e-12	2.0757e-10	17.9072	Down-Regulated
ADRA1A	-0.801079	8.43096	-7.64704	2.16984e-12	2.40108e-10	17.7549	Down-Regulated
HERPUD1	-0.994623	10.3238	-7.62212	2.49549e-12	2.7272e-10	17.6189	Down-Regulated
ABCA8	-0.877431	6.47571	-7.61564	2.58776e-12	2.8164e-10	17.5836	Down-Regulated
MBNL2	-1.03843	8.91131	-7.61428	2.60763e-12	2.8264e-10	17.5761	Down-Regulated
PDE4D	-0.981974	8.40095	-7.60161	2.79949e-12	3.02196e-10	17.5071	Down-Regulated
PITPNC1	-0.792118	7.23886	-7.59775	2.86056e-12	3.07533e-10	17.4861	Down-Regulated
PPAP2B	-0.949327	10.0125	-7.59684	2.87522e-12	3.07858e-10	17.4811	Down-Regulated
CD38	-1.69635	8.77841	-7.58952	2.99547e-12	3.1944e-10	17.4413	Down-Regulated
TSHZ3	-0.660586	7.65125	-7.58743	3.03067e-12	3.21896e-10	17.4299	Down-Regulated
PRICKLE2	-0.67369	7.71592	-7.58314	3.10436e-12	3.28404e-10	17.4065	Down-Regulated
LOC100129846	-0.979979	9.04692	-7.5752	3.24524e-12	3.41416e-10	17.3634	Down-Regulated
KCNMA1	-1.23516	8.38855	-7.57477	3.25318e-12	3.41416e-10	17.361	Down-Regulated
LOC390732	-0.730451	6.83624	-7.55419	3.64957e-12	3.80001e-10	17.2492	Down-Regulated
WWTR1	-0.88643	9.17123	-7.54856	3.76628e-12	3.84488e-10	17.2186	Down-Regulated
GPR177	-1.03711	9.51439	-7.53322	4.10286e-12	4.12579e-10	17.1353	Down-Regulated
TRIP10	-0.630667	8.50592	-7.53193	4.13257e-12	4.13993e-10	17.1283	Down-Regulated
TIMP3	-0.837554	9.37989	-7.52143	4.38177e-12	4.35656e-10	17.0714	Down-Regulated
SH3BGRL2	-1.15179	8.70814	-7.477	5.61158e-12	5.51708e-10	16.8309	Down-Regulated
SLC22A3	-2.02247	8.95493	-7.45607	6.30394e-12	6.17482e-10	16.7177	Down-Regulated
NCAPD3	-1.98663	9.98843	-7.44707	6.62708e-12	6.44362e-10	16.6692	Down-Regulated
IL33	-0.76078	6.10061	-7.44301	6.77818e-12	6.54243e-10	16.6472	Down-Regulated
FHL2	-0.787803	9.05042	-7.43288	7.16973e-12	6.8952e-10	16.5926	Down-Regulated
CAMK4	-0.848933	6.85673	-7.42942	7.30868e-12	7.00335e-10	16.574	Down-Regulated
CACNA2D1	-1.38099	7.31388	-7.40132	8.54031e-12	8.06663e-10	16.4226	Down-Regulated
LOC100127983	-0.735288	6.30637	-7.39044	9.07026e-12	8.5367e-10	16.3641	Down-Regulated
ITM2C	-0.711351	9.48476	-7.38876	9.15506e-12	8.55909e-10	16.355	Down-Regulated
AOX1	-1.11351	7.25782	-7.38869	9.15878e-12	8.55909e-10	16.3546	Down-Regulated
CFL2	-1.0836	8.13469	-7.33702	1.21837e-11	1.12273e-09	16.0773	Down-Regulated
CLIC4	-0.955052	9.2182	-7.33326	1.24392e-11	1.14229e-09	16.0571	Down-Regulated
ADH5P3	-0.651254	7.44756	-7.30353	1.46532e-11	1.33173e-09	15.8979	Down-Regulated
NDRG2	-0.721001	8.72544	-7.28554	1.61773e-11	1.4652e-09	15.8018	Down-Regulated
BCAS1	-0.853661	9.49856	-7.2784	1.68251e-11	1.51351e-09	15.7636	Down-Regulated
PCDH10	-0.741676	7.97526	-7.23261	2.16315e-11	1.90696e-09	15.5195	Down-Regulated
FILIP1L	-0.733263	7.36121	-7.23023	2.19156e-11	1.92558e-09	15.5069	Down-Regulated
MYST4	-0.603873	8.14814	-7.21514	2.3804e-11	2.0777e-09	15.4266	Down-Regulated
LOC100134188	-1.08135	7.71909	-7.20791	2.47648e-11	2.15446e-09	15.3881	Down-Regulated
LMO3	-1.10682	7.03817	-7.20401	2.52988e-11	2.1937e-09	15.3674	Down-Regulated
SERPINF1	-1.05558	8.63873	-7.16485	3.1334e-11	2.6646e-09	15.1596	Down-Regulated
UST	-0.590432	7.6027	-7.12006	3.99945e-11	3.34726e-09	14.9226	Down-Regulated
MPZL2	-1.16624	8.98994	-7.08906	4.73358e-11	3.93676e-09	14.759	Down-Regulated
LOC442245	-0.686217	8.33303	-7.07973	4.97928e-11	4.11522e-09	14.7098	Down-Regulated
ATAD1	-1.11484	8.44516	-7.06647	5.35065e-11	4.40837e-09	14.64	Down-Regulated
ACSS3	-0.856611	7.20791	-7.06289	5.4556e-11	4.46722e-09	14.6211	Down-Regulated
CACHD1	-0.726118	7.33422	-7.06288	5.45586e-11	4.46722e-09	14.6211	Down-Regulated
EFEMP1	-1.07521	8.26841	-7.03846	6.22737e-11	5.06754e-09	14.4927	Down-Regulated
OGN	-1.39426	7.09876	-7.03401	6.3792e-11	5.17518e-09	14.4693	Down-Regulated
ZC3H13	-0.609108	7.70692	-7.02553	6.67833e-11	5.38481e-09	14.4248	Down-Regulated
ADAMTS9	-0.979413	7.81886	-7.01937	6.90457e-11	5.55031e-09	14.3925	Down-Regulated
LOC442447	-0.749657	8.32751	-7.0114	7.20848e-11	5.77705e-09	14.3507	Down-Regulated
PRDM5	-0.68367	6.98142	-7.0033	7.53058e-11	5.99884e-09	14.3083	Down-Regulated
MPPED2	-1.46474	8.37897	-7.00154	7.60247e-11	6.03791e-09	14.299	Down-Regulated
SEMA3C	-1.34036	9.08529	-6.99691	7.79501e-11	6.13489e-09	14.2748	Down-Regulated
FZD7	-0.659076	7.92222	-6.9901	8.08671e-11	6.32749e-09	14.2391	Down-Regulated
CPE	-1.40197	9.85215	-6.98783	8.18619e-11	6.38644e-09	14.2272	Down-Regulated
PLXDC2	-0.875837	8.27836	-6.97848	8.60956e-11	6.69698e-09	14.1783	Down-Regulated
GBP2	-1.04435	7.31573	-6.96773	9.12281e-11	7.07539e-09	14.1221	Down-Regulated
PAM	-0.915658	7.75993	-6.9667	9.17351e-11	7.09391e-09	14.1167	Down-Regulated
COG6	-0.88678	7.8002	-6.95434	9.80482e-11	7.51617e-09	14.0521	Down-Regulated
C1S	-1.36269	8.99865	-6.95132	9.96526e-11	7.59514e-09	14.0364	Down-Regulated
LOC646609	-0.864134	7.98461	-6.94953	1.00617e-10	7.62468e-09	14.027	Down-Regulated
PLAGL1	-0.608486	7.62527	-6.93077	1.11292e-10	8.38557e-09	13.9292	Down-Regulated
POPDC2	-0.805863	7.61811	-6.91165	1.23321e-10	9.18727e-09	13.8296	Down-Regulated
MAML2	-0.684618	8.45542	-6.90678	1.26585e-10	9.40394e-09	13.8043	Down-Regulated
HHIP	-0.936494	7.37021	-6.9049	1.27866e-10	9.47249e-09	13.7945	Down-Regulated
NFIA	-0.666281	9.2968	-6.90417	1.28371e-10	9.48335e-09	13.7907	Down-Regulated
AZGP1P1	-0.89012	8.947	-6.87737	1.48187e-10	1.07671e-08	13.6514	Down-Regulated
TGFB3	-1.10745	8.75083	-6.87737	1.48192e-10	1.07671e-08	13.6514	Down-Regulated
NEO1	-0.813496	9.31359	-6.87421	1.50718e-10	1.09206e-08	13.635	Down-Regulated
SERPINA3	-2.16397	9.46943	-6.87228	1.52276e-10	1.10034e-08	13.625	Down-Regulated
ITGA5	-1.01694	9.08587	-6.86609	1.57409e-10	1.13433e-08	13.5928	Down-Regulated
SLC15A2	-1.55856	9.01257	-6.86553	1.57882e-10	1.13464e-08	13.5899	Down-Regulated
FNDC3A	-0.789342	8.2491	-6.86144	1.6137e-10	1.15657e-08	13.5687	Down-Regulated
MASP1	-0.802269	7.75695	-6.85627	1.6589e-10	1.18341e-08	13.5419	Down-Regulated
IL6ST	-1.02234	9.40385	-6.84278	1.78287e-10	1.26074e-08	13.472	Down-Regulated
MAGI2	-0.635776	7.3411	-6.83817	1.82722e-10	1.28523e-08	13.4482	Down-Regulated
GLIPR2	-0.727682	8.27516	-6.82036	2.00929e-10	1.40954e-08	13.3561	Down-Regulated
PRUNE2	-1.34696	8.84803	-6.80678	2.16007e-10	1.50335e-08	13.2859	Down-Regulated
ITM2B	-0.640164	10.1006	-6.79358	2.31728e-10	1.60013e-08	13.2178	Down-Regulated
ADHFE1	-0.994247	8.11657	-6.79074	2.35254e-10	1.61186e-08	13.2031	Down-Regulated
CES4	-0.816285	8.13406	-6.78271	2.45518e-10	1.66921e-08	13.1617	Down-Regulated
ANGPT1	-0.716384	6.36658	-6.7637	2.716e-10	1.83076e-08	13.0638	Down-Regulated
RAB27A	-1.27195	8.95409	-6.73389	3.18107e-10	2.11914e-08	12.9106	Down-Regulated
EPHA7	-1.20589	7.8252	-6.7293	3.25931e-10	2.16581e-08	12.887	Down-Regulated
NR4A1	-1.31969	10.4154	-6.72347	3.36147e-10	2.22809e-08	12.8571	Down-Regulated
TRIM22	-0.987582	7.42044	-6.6857	4.10416e-10	2.67347e-08	12.6636	Down-Regulated
DSTN	-0.680248	9.39903	-6.6803	4.22268e-10	2.74391e-08	12.636	Down-Regulated
PRRX1	-0.833308	7.98157	-6.66308	4.62396e-10	2.98795e-08	12.548	Down-Regulated
CLIP4	-0.722332	7.40544	-6.66275	4.63213e-10	2.98795e-08	12.5463	Down-Regulated
PRNP	-0.706461	9.71599	-6.64163	5.17676e-10	3.33114e-08	12.4386	Down-Regulated
KIT	-0.732576	6.54617	-6.63464	5.37034e-10	3.43897e-08	12.403	Down-Regulated
DKK3	-0.699143	8.87241	-6.62731	5.58123e-10	3.54824e-08	12.3657	Down-Regulated
ZAK	-0.680232	8.26868	-6.61265	6.02798e-10	3.82307e-08	12.2911	Down-Regulated
GSTM4	-0.863816	8.6093	-6.61128	6.0713e-10	3.83216e-08	12.2842	Down-Regulated
LOC646517	-0.659141	8.25623	-6.58583	6.9381e-10	4.33787e-08	12.1549	Down-Regulated
CRIM1	-0.632	8.58032	-6.55258	8.25543e-10	5.05397e-08	11.9865	Down-Regulated
SELE	-1.35027	7.53882	-6.54702	8.49882e-10	5.19096e-08	11.9583	Down-Regulated
SCHIP1	-0.591313	7.51211	-6.53775	8.92027e-10	5.3985e-08	11.9115	Down-Regulated
P2RY5	-1.02543	7.42082	-6.50114	1.0794e-09	6.30177e-08	11.7268	Down-Regulated
FABP3	-0.676933	7.17765	-6.50044	1.08334e-09	6.31083e-08	11.7233	Down-Regulated
ANO5	-0.840886	6.01192	-6.4917	1.13371e-09	6.57527e-08	11.6793	Down-Regulated
FAT4	-0.815842	7.13817	-6.48719	1.1606e-09	6.67271e-08	11.6566	Down-Regulated
GLB1L3	-0.663096	10.1931	-6.47465	1.23871e-09	7.07564e-08	11.5935	Down-Regulated
TSC22D1	-0.790729	9.90853	-6.46902	1.27546e-09	7.23862e-08	11.5652	Down-Regulated
DUSP1	-1.17988	11.2598	-6.46471	1.30428e-09	7.37059e-08	11.5436	Down-Regulated
ETS2	-0.99085	8.94235	-6.46373	1.3109e-09	7.39218e-08	11.5387	Down-Regulated
ZNF185	-0.652506	7.89108	-6.4619	1.32345e-09	7.4313e-08	11.5295	Down-Regulated
GSTM1	-0.869041	8.47237	-6.44331	1.45721e-09	8.01223e-08	11.4363	Down-Regulated
ABCC9	-0.722612	7.35379	-6.44064	1.47755e-09	8.1072e-08	11.4228	Down-Regulated
ATP10D	-0.640015	7.27326	-6.43152	1.54887e-09	8.41128e-08	11.3772	Down-Regulated
WTAP	-0.698337	9.32087	-6.42309	1.61792e-09	8.71468e-08	11.335	Down-Regulated
CYP1B1	-1.3833	8.9282	-6.41965	1.64696e-09	8.83513e-08	11.3178	Down-Regulated
FAM107B	-0.62231	7.99452	-6.41324	1.70241e-09	9.09571e-08	11.2857	Down-Regulated
BHLHE40	-1.03394	9.07778	-6.41056	1.72607e-09	9.20351e-08	11.2724	Down-Regulated
UFM1	-0.812056	9.08473	-6.40728	1.75554e-09	9.32304e-08	11.256	Down-Regulated
ALDH2	-0.771043	8.85784	-6.39414	1.87876e-09	9.91766e-08	11.1903	Down-Regulated
ITGA1	-1.05588	8.29924	-6.38696	1.94953e-09	1.02503e-07	11.1546	Down-Regulated
ANO4	-0.715054	6.3853	-6.38576	1.96168e-09	1.02938e-07	11.1485	Down-Regulated
A2M	-1.23215	10.037	-6.37281	2.09691e-09	1.08953e-07	11.084	Down-Regulated
TNC	-0.97449	8.44182	-6.3522	2.33138e-09	1.19724e-07	10.9815	Down-Regulated
GPM6B	-0.691248	6.90309	-6.34461	2.42405e-09	1.24046e-07	10.9438	Down-Regulated
LOC652799	-0.767933	6.1504	-6.33963	2.4868e-09	1.26706e-07	10.919	Down-Regulated
GSN	-0.74842	9.70602	-6.32798	2.63999e-09	1.33754e-07	10.8612	Down-Regulated
HOXD10	-0.985188	7.54756	-6.32006	2.7494e-09	1.38238e-07	10.8219	Down-Regulated
SLC2A3	-1.09709	8.64781	-6.31927	2.76058e-09	1.38386e-07	10.818	Down-Regulated
NOSTRIN	-0.736158	6.6411	-6.31911	2.7628e-09	1.38386e-07	10.8172	Down-Regulated
KCNAB1	-0.821952	6.91447	-6.31817	2.77612e-09	1.3879e-07	10.8126	Down-Regulated
C4orf31	-0.785703	7.12556	-6.31633	2.80237e-09	1.39838e-07	10.8035	Down-Regulated
SVIL	-0.902238	8.99768	-6.31293	2.85169e-09	1.42032e-07	10.7866	Down-Regulated
PCCA	-0.693637	8.52042	-6.30044	3.03989e-09	1.50273e-07	10.7248	Down-Regulated
RBMS3	-0.761615	7.53591	-6.29123	3.18644e-09	1.56348e-07	10.6792	Down-Regulated
RND3	-1.07684	7.57864	-6.29018	3.20364e-09	1.56901e-07	10.674	Down-Regulated
CHRNA2	-1.08324	9.23456	-6.28928	3.21836e-09	1.57331e-07	10.6696	Down-Regulated
PARP6	-0.850558	8.54074	-6.26387	3.66414e-09	1.76192e-07	10.5441	Down-Regulated
CAP2	-0.751311	8.12024	-6.24249	4.0858e-09	1.94347e-07	10.4388	Down-Regulated
CAV1	-0.881126	7.66565	-6.24104	4.11611e-09	1.95088e-07	10.4317	Down-Regulated
TPT1	-0.587216	11.5189	-6.23732	4.19476e-09	1.98459e-07	10.4134	Down-Regulated
NBL1	-0.676135	9.54588	-6.23206	4.30852e-09	2.03477e-07	10.3875	Down-Regulated
PBX1	-0.603879	9.52138	-6.23052	4.34247e-09	2.04351e-07	10.3799	Down-Regulated
COL14A1	-1.00198	7.61318	-6.21835	4.61934e-09	2.16189e-07	10.3202	Down-Regulated
AKAP11	-0.601908	7.66846	-6.21769	4.63492e-09	2.1619e-07	10.3169	Down-Regulated
IGJ	-2.06148	7.81279	-6.2101	4.817e-09	2.23893e-07	10.2797	Down-Regulated
TAOK3	-0.774215	8.42557	-6.18093	5.58462e-09	2.55089e-07	10.1367	Down-Regulated
LOC100133404	-0.623253	8.02719	-6.15594	6.33678e-09	2.85447e-07	10.0146	Down-Regulated
SOD2	-1.05911	10.3543	-6.15231	6.454e-09	2.89794e-07	9.99692	Down-Regulated
ANPEP	-1.86544	9.67297	-6.15174	6.47249e-09	2.90132e-07	9.99415	Down-Regulated
LPP	-0.663031	10.087	-6.14401	6.73016e-09	3.00156e-07	9.95643	Down-Regulated
ASB5	-0.932635	6.27337	-6.12981	7.22959e-09	3.18138e-07	9.88726	Down-Regulated
MTUS1	-0.628897	7.93071	-6.12688	7.33736e-09	3.22344e-07	9.87297	Down-Regulated
LPAR1	-0.829439	8.66866	-6.1023	8.30306e-09	3.5764e-07	9.75352	Down-Regulated
COG3	-0.81322	8.62858	-6.10146	8.3383e-09	3.58574e-07	9.74943	Down-Regulated
MMP2	-0.943852	8.5076	-6.09331	8.68702e-09	3.71156e-07	9.70985	Down-Regulated
SLC2A14	-0.895814	8.50824	-6.08462	9.07418e-09	3.85828e-07	9.66773	Down-Regulated
ACTC1	-0.850637	7.35374	-6.06821	9.85237e-09	4.12287e-07	9.58827	Down-Regulated
ITGA8	-1.39199	7.46768	-6.06714	9.90535e-09	4.13197e-07	9.58309	Down-Regulated
LTF	-2.5535	9.2104	-6.06714	9.90536e-09	4.13197e-07	9.58309	Down-Regulated
LOC728320	-2.49219	8.95778	-6.05782	1.03787e-08	4.32237e-07	9.538	Down-Regulated
LMO7	-0.746338	7.93642	-6.04038	1.13249e-08	4.67255e-07	9.45375	Down-Regulated
FAM129A	-0.69126	10.5314	-6.03958	1.137e-08	4.67655e-07	9.44992	Down-Regulated
ATP8B1	-0.780521	9.45284	-6.03681	1.15285e-08	4.73438e-07	9.43655	Down-Regulated
EFCAB4B	-0.616686	8.03693	-6.02407	1.22854e-08	5.02958e-07	9.37516	Down-Regulated
IRAK3	-0.621948	6.21321	-6.02183	1.24238e-08	5.07839e-07	9.36434	Down-Regulated
B4GALT1	-0.681873	9.45693	-5.99518	1.41877e-08	5.71543e-07	9.23617	Down-Regulated
LTBP1	-0.851113	8.90339	-5.99258	1.43729e-08	5.75941e-07	9.22365	Down-Regulated
IRS1	-0.610839	8.48802	-5.98691	1.47838e-08	5.88834e-07	9.19645	Down-Regulated
RARB	-0.591825	7.11711	-5.98636	1.48244e-08	5.89564e-07	9.1938	Down-Regulated
MT1G	-1.1868	10.006	-5.96553	1.64398e-08	6.48931e-07	9.09397	Down-Regulated
LOC100127897	-0.632997	8.10885	-5.95022	1.77371e-08	6.929e-07	9.02068	Down-Regulated
CEACAM1	-0.910296	8.40592	-5.94768	1.79615e-08	6.99959e-07	9.00854	Down-Regulated
ROBO1	-0.826478	8.068	-5.94012	1.86465e-08	7.22027e-07	8.97243	Down-Regulated
SEC14L2	-0.649354	8.60715	-5.92912	1.96892e-08	7.5686e-07	8.91993	Down-Regulated
KRT15	-1.08462	8.41848	-5.92616	1.99803e-08	7.63612e-07	8.90577	Down-Regulated
PTEN	-0.607134	8.88251	-5.90425	2.22626e-08	8.39913e-07	8.80142	Down-Regulated
FXYD6	-0.707747	9.04868	-5.90177	2.25369e-08	8.49049e-07	8.78961	Down-Regulated
MAPK10	-0.929423	8.42863	-5.89773	2.29905e-08	8.64908e-07	8.77039	Down-Regulated
LOC642132	-0.868873	8.06353	-5.89421	2.33931e-08	8.77558e-07	8.75364	Down-Regulated
MYOF	-1.09552	8.60412	-5.89035	2.38418e-08	8.93123e-07	8.73532	Down-Regulated
OSMR	-0.934981	8.24448	-5.8796	2.51376e-08	9.3504e-07	8.68427	Down-Regulated
WBSCR17	-0.613745	7.71967	-5.86734	2.67e-08	9.87601e-07	8.62612	Down-Regulated
GLT8D2	-0.605935	6.62939	-5.86392	2.71529e-08	1.00016e-06	8.6099	Down-Regulated
ESD	-0.628088	7.8296	-5.85772	2.79918e-08	1.02962e-06	8.58056	Down-Regulated
ZDHHC2	-0.634493	7.98605	-5.85724	2.80586e-08	1.03065e-06	8.57826	Down-Regulated
CYP27A1	-0.910586	7.76137	-5.85503	2.83645e-08	1.04044e-06	8.5678	Down-Regulated
PDGFRA	-0.768271	7.5286	-5.8532	2.86201e-08	1.04691e-06	8.55915	Down-Regulated
LOC144481	-0.709724	8.07959	-5.85131	2.88875e-08	1.05428e-06	8.55018	Down-Regulated
FBXL3	-0.672639	9.07829	-5.85107	2.89204e-08	1.05428e-06	8.54909	Down-Regulated
GABRE	-0.952505	7.8707	-5.84172	3.02781e-08	1.09427e-06	8.50485	Down-Regulated
AKT3	-0.967778	8.19246	-5.83808	3.08225e-08	1.10907e-06	8.48767	Down-Regulated
PDK4	-1.23169	8.47893	-5.82945	3.21544e-08	1.14762e-06	8.44688	Down-Regulated
ERAP1	-0.664165	8.10571	-5.81607	3.43297e-08	1.21379e-06	8.38377	Down-Regulated
GSTP1	-0.881287	9.5276	-5.81279	3.48848e-08	1.23177e-06	8.36831	Down-Regulated
KRT5	-1.2122	9.65692	-5.81224	3.49794e-08	1.23347e-06	8.3657	Down-Regulated
OSBPL9	-0.644933	8.90918	-5.81052	3.52733e-08	1.24052e-06	8.35764	Down-Regulated
IL1R1	-0.926498	9.68916	-5.78678	3.96074e-08	1.3801e-06	8.24593	Down-Regulated
LOC100133895	-0.825066	7.03945	-5.7857	3.98176e-08	1.38378e-06	8.24083	Down-Regulated
RSPO2	-0.645666	6.40602	-5.77907	4.11249e-08	1.42546e-06	8.2097	Down-Regulated
LSAMP	-1.07772	8.2666	-5.76871	4.32512e-08	1.48941e-06	8.16112	Down-Regulated
PALMD	-0.706976	7.51365	-5.76625	4.37728e-08	1.5015e-06	8.14957	Down-Regulated
HIPK3	-0.613787	9.3082	-5.76443	4.41624e-08	1.51291e-06	8.14103	Down-Regulated
ZFP36	-1.1344	9.83491	-5.7353	5.08753e-08	1.71183e-06	8.00469	Down-Regulated
SULF1	-1.02737	8.08495	-5.72837	5.26135e-08	1.76358e-06	7.97233	Down-Regulated
PEBP4	-0.843595	8.09015	-5.70782	5.81158e-08	1.92364e-06	7.87652	Down-Regulated
N4BP2L2	-0.610043	8.83854	-5.67572	6.7858e-08	2.18713e-06	7.72727	Down-Regulated
C1R	-0.886945	8.99913	-5.67498	6.81013e-08	2.19109e-06	7.72383	Down-Regulated
ARMCX1	-0.588805	7.75384	-5.66511	7.14156e-08	2.28937e-06	7.67807	Down-Regulated
RHOBTB3	-0.78086	9.0503	-5.64825	7.74517e-08	2.47089e-06	7.59996	Down-Regulated
TRIM38	-0.627191	8.46831	-5.6449	7.87078e-08	2.50433e-06	7.58447	Down-Regulated
TNFSF10	-0.692471	9.48533	-5.631	8.41373e-08	2.65852e-06	7.52026	Down-Regulated
HMCN1	-0.751104	6.80561	-5.62991	8.45787e-08	2.66928e-06	7.51522	Down-Regulated
MT1E	-1.15802	9.94658	-5.61289	9.17689e-08	2.8893e-06	7.4367	Down-Regulated
LDLR	-0.70819	9.61981	-5.60583	9.49207e-08	2.97437e-06	7.4042	Down-Regulated
GBP1	-0.852434	7.67016	-5.58131	1.06717e-07	3.29209e-06	7.29149	Down-Regulated
CTGF	-0.840713	9.40337	-5.56565	1.14993e-07	3.524e-06	7.21964	Down-Regulated
ACSL4	-0.683633	6.57816	-5.5603	1.17961e-07	3.61078e-06	7.19512	Down-Regulated
NEFH	-1.76367	9.88366	-5.55033	1.23688e-07	3.7521e-06	7.14952	Down-Regulated
HSD17B6	-1.57552	7.88347	-5.53727	1.3161e-07	3.96887e-06	7.08981	Down-Regulated
NFE2L2	-0.642195	8.55378	-5.53679	1.31906e-07	3.97325e-06	7.08766	Down-Regulated
ZEB1	-0.635219	7.5383	-5.51716	1.44781e-07	4.31134e-06	6.9981	Down-Regulated
DCN	-1.10691	8.47948	-5.513	1.47663e-07	4.38791e-06	6.97915	Down-Regulated
FBLN5	-0.839383	8.10086	-5.51259	1.47949e-07	4.39148e-06	6.97728	Down-Regulated
LOC730200	-0.720191	5.53699	-5.50678	1.52077e-07	4.49887e-06	6.95082	Down-Regulated
ANXA1	-1.25353	8.82052	-5.50536	1.53103e-07	4.52415e-06	6.94436	Down-Regulated
TSC22D3	-0.844673	9.20358	-5.50313	1.54723e-07	4.56184e-06	6.93424	Down-Regulated
EPHX2	-0.823186	8.75373	-5.50287	1.54917e-07	4.56247e-06	6.93304	Down-Regulated
PJA2	-0.723664	9.82855	-5.48948	1.65034e-07	4.8175e-06	6.87222	Down-Regulated
CPLX3	-0.960676	8.69106	-5.48753	1.66562e-07	4.85661e-06	6.86336	Down-Regulated
ANO6	-0.843855	7.94062	-5.47626	1.75661e-07	5.08282e-06	6.81224	Down-Regulated
MT2A	-0.867504	11.5733	-5.47476	1.76911e-07	5.10782e-06	6.80542	Down-Regulated
KLK4	-0.967158	10.5454	-5.47378	1.77728e-07	5.11996e-06	6.80099	Down-Regulated
LCP1	-0.903214	10.2509	-5.47198	1.79244e-07	5.13594e-06	6.79283	Down-Regulated
TP63	-0.97398	7.65458	-5.4695	1.81355e-07	5.1796e-06	6.78157	Down-Regulated
MAMDC2	-0.602704	6.85785	-5.46293	1.87053e-07	5.32508e-06	6.75184	Down-Regulated
COCH	-0.663589	7.69701	-5.44595	2.02607e-07	5.72473e-06	6.67509	Down-Regulated
LOC653882	-0.644942	6.54249	-5.44089	2.07485e-07	5.84382e-06	6.65223	Down-Regulated
FMOD	-1.06252	8.71023	-5.43661	2.11702e-07	5.9436e-06	6.6329	Down-Regulated
C15orf51	-0.616911	8.6366	-5.43574	2.12569e-07	5.95531e-06	6.62897	Down-Regulated
FLRT3	-0.989206	6.99429	-5.41001	2.39819e-07	6.66929e-06	6.51309	Down-Regulated
KLF4	-0.78163	7.88303	-5.40882	2.41155e-07	6.6994e-06	6.50776	Down-Regulated
PCOLCE2	-0.625345	7.18565	-5.40671	2.43547e-07	6.75166e-06	6.49828	Down-Regulated
CLU	-0.800152	9.16453	-5.3996	2.51794e-07	6.94389e-06	6.46629	Down-Regulated
ADAMTS1	-1.04365	9.07419	-5.39783	2.53882e-07	6.98691e-06	6.45836	Down-Regulated
NNT	-0.62856	8.3334	-5.39306	2.596e-07	7.10258e-06	6.43697	Down-Regulated
LOC642587	-1.0849	8.79332	-5.39243	2.60365e-07	7.11351e-06	6.43414	Down-Regulated
IL1RL1	-0.592931	6.15605	-5.37301	2.85069e-07	7.68525e-06	6.34709	Down-Regulated
HLA-H	-0.613766	10.6907	-5.36016	3.02645e-07	8.08489e-06	6.28965	Down-Regulated
TRIM29	-0.986625	8.17439	-5.35652	3.07821e-07	8.19008e-06	6.27337	Down-Regulated
PDS5B	-0.617033	7.80699	-5.34769	3.2072e-07	8.51615e-06	6.23396	Down-Regulated
B2M	-0.625902	11.1322	-5.34458	3.25395e-07	8.61433e-06	6.22007	Down-Regulated
HLA-B	-0.703402	11.497	-5.3392	3.3363e-07	8.78835e-06	6.19608	Down-Regulated
RARRES1	-0.832893	8.17933	-5.3323	3.44485e-07	9.05625e-06	6.16535	Down-Regulated
RPL31P57	-1.1107	9.08902	-5.32953	3.48944e-07	9.13714e-06	6.15301	Down-Regulated
PDLIM1	-0.693997	8.46878	-5.32633	3.54162e-07	9.25545e-06	6.13876	Down-Regulated
SLIT2	-0.76879	7.62799	-5.32381	3.58324e-07	9.33653e-06	6.12755	Down-Regulated
PTPN13	-0.728803	8.65251	-5.31508	3.73112e-07	9.70275e-06	6.08874	Down-Regulated
HEPH	-0.600207	6.90077	-5.29791	4.03938e-07	1.0392e-05	6.01257	Down-Regulated
ACAT2	-0.596421	7.50193	-5.29238	4.14395e-07	1.06094e-05	5.98805	Down-Regulated
PODN	-0.631904	8.4841	-5.26031	4.80412e-07	1.20203e-05	5.84625	Down-Regulated
SEMA6A	-0.860261	7.89984	-5.24462	5.1631e-07	1.27974e-05	5.77714	Down-Regulated
SLC18A2	-0.836116	7.3476	-5.24037	5.26489e-07	1.29889e-05	5.75842	Down-Regulated
LUM	-1.09707	7.88461	-5.23373	5.42769e-07	1.32913e-05	5.72922	Down-Regulated
SRGN	-0.852652	8.66818	-5.23027	5.51456e-07	1.34916e-05	5.714	Down-Regulated
LTBP4	-0.593051	9.31447	-5.20243	6.26362e-07	1.49913e-05	5.5919	Down-Regulated
PLCL1	-0.65013	6.74227	-5.20018	6.32834e-07	1.51052e-05	5.58205	Down-Regulated
LOC441734	-0.668642	9.02947	-5.17989	6.94196e-07	1.6305e-05	5.49336	Down-Regulated
MT1H	-0.720779	8.54716	-5.17746	7.0194e-07	1.64576e-05	5.48273	Down-Regulated
LPAR3	-0.816205	9.40264	-5.17235	7.1844e-07	1.67406e-05	5.46047	Down-Regulated
THSD4	-0.616966	8.80589	-5.16899	7.29506e-07	1.69685e-05	5.44582	Down-Regulated
CTSO	-0.625697	7.80518	-5.16663	7.37403e-07	1.71372e-05	5.43551	Down-Regulated
PTPRM	-0.820571	8.86228	-5.16429	7.45273e-07	1.72711e-05	5.42534	Down-Regulated
GLB1L2	-0.657786	9.19375	-5.14037	8.30766e-07	1.89081e-05	5.32131	Down-Regulated
HLA-A	-0.647412	11.5323	-5.13958	8.3376e-07	1.89591e-05	5.31786	Down-Regulated
RAB27B	-0.765368	9.35654	-5.1394	8.34437e-07	1.89591e-05	5.31709	Down-Regulated
DNAJB4	-0.749857	6.8781	-5.13389	8.555e-07	1.93877e-05	5.29321	Down-Regulated
ALDH7A1	-0.599766	8.81727	-5.12909	8.74309e-07	1.978e-05	5.27238	Down-Regulated
LOC100133793	-1.47273	10.0205	-5.1284	8.77042e-07	1.98109e-05	5.26939	Down-Regulated
ITPR2	-0.871987	8.5513	-5.12663	8.84086e-07	1.9933e-05	5.26173	Down-Regulated
MT1M	-0.869097	9.18827	-5.12037	9.09491e-07	2.04188e-05	5.2346	Down-Regulated
FSTL1	-0.773808	10.2506	-5.1127	9.41578e-07	2.10143e-05	5.2014	Down-Regulated
GJA1	-0.586811	6.92388	-5.09931	1.00026e-06	2.19436e-05	5.14353	Down-Regulated
PGRMC1	-0.651242	9.59778	-5.07978	1.09223e-06	2.35999e-05	5.05932	Down-Regulated
SPON1	-0.586992	7.12827	-5.07352	1.12339e-06	2.41941e-05	5.0324	Down-Regulated
CCL2	-1.18406	8.41089	-5.07312	1.12543e-06	2.41986e-05	5.03067	Down-Regulated
ABAT	-0.617447	8.75645	-5.07006	1.14099e-06	2.44338e-05	5.01752	Down-Regulated
CYR61	-1.03701	9.24734	-5.06324	1.17647e-06	2.50718e-05	4.98822	Down-Regulated
HLA-C	-0.606437	11.3487	-5.05793	1.20486e-06	2.55531e-05	4.9654	Down-Regulated
SLC1A1	-0.636348	7.44097	-5.03381	1.34232e-06	2.79091e-05	4.86204	Down-Regulated
HLA-E	-0.591477	10.2354	-5.03256	1.34986e-06	2.80218e-05	4.85668	Down-Regulated
KLHL5	-0.682043	7.64266	-5.01105	1.48594e-06	3.05351e-05	4.76482	Down-Regulated
LOC100133706	-1.39535	9.87575	-4.99626	1.58713e-06	3.22581e-05	4.70183	Down-Regulated
EFR3A	-0.642522	8.5366	-4.99608	1.58839e-06	3.22581e-05	4.70107	Down-Regulated
PTGDS	-0.686157	10.0093	-4.97678	1.73071e-06	3.44511e-05	4.61903	Down-Regulated
PDLIM3	-0.884919	8.24906	-4.97624	1.73483e-06	3.44511e-05	4.61676	Down-Regulated
OLFM4	-1.70997	7.50348	-4.96543	1.82002e-06	3.57874e-05	4.57094	Down-Regulated
GREB1	-0.736677	10.2536	-4.96072	1.85845e-06	3.62199e-05	4.55097	Down-Regulated
CD69	-0.822303	6.99938	-4.95702	1.88918e-06	3.67105e-05	4.5353	Down-Regulated
ITGA2	-0.618732	7.70978	-4.95504	1.90579e-06	3.70061e-05	4.52693	Down-Regulated
SORD	-0.80331	11.3345	-4.93689	2.06498e-06	3.9603e-05	4.45028	Down-Regulated
EPHA5	-0.784017	7.00585	-4.92171	2.20805e-06	4.17415e-05	4.38628	Down-Regulated
CCDC80	-0.852231	7.55476	-4.92006	2.22416e-06	4.2016e-05	4.37934	Down-Regulated
DST	-0.902579	8.023	-4.90709	2.35479e-06	4.40744e-05	4.32483	Down-Regulated
MT1X	-0.830149	9.7079	-4.90632	2.36278e-06	4.41614e-05	4.32159	Down-Regulated
ST6GALNAC1	-0.748827	7.72984	-4.8953	2.48011e-06	4.58681e-05	4.27531	Down-Regulated
C7	-0.725997	9.91701	-4.88833	2.55715e-06	4.70298e-05	4.2461	Down-Regulated
PTN	-0.739271	7.91006	-4.88623	2.58082e-06	4.73335e-05	4.23731	Down-Regulated
MT1A	-0.812379	9.89243	-4.85942	2.90219e-06	5.24636e-05	4.12528	Down-Regulated
LOC283155	-0.627765	8.77458	-4.85412	2.97021e-06	5.35468e-05	4.10317	Down-Regulated
SEPP1	-0.894147	8.71495	-4.85003	3.02364e-06	5.43249e-05	4.08615	Down-Regulated
GADD45B	-0.721266	9.50298	-4.84596	3.07784e-06	5.51115e-05	4.0692	Down-Regulated
DHCR24	-0.785866	10.9145	-4.83698	3.20078e-06	5.7081e-05	4.03182	Down-Regulated
MAN1A1	-0.668593	8.33827	-4.82983	3.30201e-06	5.86096e-05	4.00212	Down-Regulated
SNAI2	-0.658896	7.61903	-4.81382	3.54004e-06	6.22497e-05	3.93572	Down-Regulated
ABCC4	-0.931563	10.6615	-4.80589	3.66398e-06	6.40035e-05	3.9029	Down-Regulated
THBS4	-0.832488	7.79068	-4.80477	3.68176e-06	6.42292e-05	3.89828	Down-Regulated
LOC652614	-0.679936	11.7792	-4.80126	3.73836e-06	6.50022e-05	3.88373	Down-Regulated
NRK	-0.647862	6.13392	-4.79638	3.81828e-06	6.59152e-05	3.86356	Down-Regulated
BDH2	-0.596111	6.6346	-4.78437	4.02199e-06	6.88921e-05	3.814	Down-Regulated
VGLL3	-1.06298	8.22771	-4.77969	4.10421e-06	7.00432e-05	3.79471	Down-Regulated
MT1F	-0.81804	10.2152	-4.77272	4.22964e-06	7.19366e-05	3.76601	Down-Regulated
SORD2	-0.736407	10.3114	-4.77013	4.27727e-06	7.25134e-05	3.75534	Down-Regulated
POTEG	-1.21427	10.3898	-4.76851	4.30731e-06	7.29759e-05	3.74866	Down-Regulated
LOC100132409	-0.61183	8.31835	-4.76259	4.41859e-06	7.45271e-05	3.72435	Down-Regulated
LOC732446	-0.631519	8.75413	-4.75371	4.59095e-06	7.70412e-05	3.68788	Down-Regulated
POTEH	-1.17672	10.5897	-4.75078	4.64929e-06	7.77243e-05	3.67585	Down-Regulated
LOC643778	-0.637075	9.23575	-4.74905	4.68397e-06	7.82051e-05	3.66876	Down-Regulated
FZD3	-0.59081	7.92951	-4.74742	4.7171e-06	7.86095e-05	3.66205	Down-Regulated
LOC729822	-0.633797	7.56205	-4.74662	4.73337e-06	7.87813e-05	3.65877	Down-Regulated
CORO1C	-0.646529	9.00524	-4.73797	4.91272e-06	8.13568e-05	3.62333	Down-Regulated
ACAD8	-0.871093	8.80094	-4.73319	5.01448e-06	8.26795e-05	3.6038	Down-Regulated
PDE4B	-0.593825	7.41809	-4.7235	5.22752e-06	8.55522e-05	3.56416	Down-Regulated
MCTP2	-0.817808	8.35759	-4.72117	5.28005e-06	8.62516e-05	3.55464	Down-Regulated
ZFP36L1	-0.624615	9.61166	-4.70827	5.57998e-06	9.03144e-05	3.50201	Down-Regulated
BMPR1A	-0.632414	9.09894	-4.69873	5.81213e-06	9.36135e-05	3.4632	Down-Regulated
MT1L	-0.710932	9.92732	-4.69454	5.9171e-06	9.48422e-05	3.44615	Down-Regulated
PPP1R3C	-0.773957	7.74963	-4.68616	6.13277e-06	9.77068e-05	3.41207	Down-Regulated
LMAN1L	-0.756075	8.6664	-4.68528	6.15585e-06	9.79565e-05	3.40849	Down-Regulated
EMP1	-0.859337	8.14727	-4.67876	6.32935e-06	0.000100596	3.38203	Down-Regulated
ADAM22	-0.610488	7.042	-4.67379	6.46476e-06	0.000102379	3.36188	Down-Regulated
ZNF827	-0.628809	9.22207	-4.67309	6.48398e-06	0.000102561	3.35905	Down-Regulated
IQGAP2	-0.843826	8.64717	-4.67168	6.523e-06	0.000103116	3.35334	Down-Regulated
TMBIM1	-0.632287	9.81155	-4.66698	6.65466e-06	0.000104822	3.33432	Down-Regulated
PDE11A	-0.617254	9.17852	-4.66197	6.79803e-06	0.000106889	3.31404	Down-Regulated
LOC100128892	-0.857733	6.78362	-4.66178	6.80356e-06	0.000106912	3.31326	Down-Regulated
LIFR	-0.875992	9.18321	-4.65322	7.05541e-06	0.000110346	3.27867	Down-Regulated
NEDD9	-0.600444	8.57112	-4.64331	7.35838e-06	0.000114475	3.23867	Down-Regulated
C1orf150	-0.691117	6.93919	-4.64275	7.37583e-06	0.000114611	3.23641	Down-Regulated
BAG2	-0.683171	8.39272	-4.64052	7.44592e-06	0.000115362	3.22741	Down-Regulated
DHRS7	-0.859016	9.90973	-4.6369	7.56101e-06	0.000117008	3.21282	Down-Regulated
CYB5A	-0.687952	9.17208	-4.63177	7.72707e-06	0.000118882	3.19216	Down-Regulated
ZNF589	-0.662134	8.3692	-4.63099	7.75263e-06	0.000119106	3.18901	Down-Regulated
MME	-1.37564	8.5702	-4.62785	7.85637e-06	0.000120216	3.17637	Down-Regulated
CRYZ	-0.588275	7.89228	-4.61872	8.16531e-06	0.000123752	3.13968	Down-Regulated
LOC100131817	-1.23849	10.4383	-4.61576	8.26799e-06	0.000124808	3.1278	Down-Regulated
P704P	-0.769618	11.6794	-4.6015	8.78057e-06	0.000131346	3.0706	Down-Regulated
MALT1	-0.67784	8.54893	-4.59729	8.93784e-06	0.000133171	3.05372	Down-Regulated
COL12A1	-0.812642	8.30134	-4.59437	9.04826e-06	0.000134665	3.04205	Down-Regulated
RP5-1022P6.2	-0.624408	7.80258	-4.58622	9.36399e-06	0.000138593	3.00945	Down-Regulated
COL6A3	-0.613304	8.86678	-4.57987	9.61705e-06	0.000141865	2.9841	Down-Regulated
NANS	-0.630939	9.07261	-4.55644	1.06099e-05	0.00015446	2.89073	Down-Regulated
CDK6	-0.657461	7.35724	-4.51909	1.23997e-05	0.000176404	2.74267	Down-Regulated
NR4A3	-0.68301	8.20664	-4.51626	1.25461e-05	0.000177975	2.73153	Down-Regulated
C2orf43	-0.590194	6.27458	-4.51618	1.25505e-05	0.000177975	2.7312	Down-Regulated
GBP3	-0.600732	6.94597	-4.51359	1.26867e-05	0.000179522	2.72094	Down-Regulated
RAB23	-0.696836	7.93073	-4.50665	1.3058e-05	0.000184184	2.69356	Down-Regulated
ECHDC1	-0.655575	7.98274	-4.48806	1.41047e-05	0.000196952	2.62037	Down-Regulated
KRT17	-0.624015	9.7463	-4.48522	1.42713e-05	0.000198649	2.60923	Down-Regulated
PTGS2	-1.04898	8.09979	-4.45711	1.60288e-05	0.000219758	2.49905	Down-Regulated
CSRNP1	-0.620299	8.35973	-4.432	1.77732e-05	0.000240557	2.40108	Down-Regulated
LDHB	-0.917045	9.11298	-4.41554	1.9015e-05	0.000255015	2.33706	Down-Regulated
CYBRD1	-0.785825	9.80515	-4.40489	1.98619e-05	0.000264096	2.29577	Down-Regulated
GULP1	-0.730487	7.10395	-4.3993	2.03212e-05	0.000269661	2.2741	Down-Regulated
KLK3	-0.863673	12.8823	-4.3989	2.03541e-05	0.000269963	2.27257	Down-Regulated
NFIL3	-0.728921	8.13885	-4.38976	2.11283e-05	0.000278693	2.2372	Down-Regulated
LOC100133484	-0.662198	9.8347	-4.38256	2.17572e-05	0.000285282	2.20941	Down-Regulated
TARP	-1.18022	10.6935	-4.38194	2.18125e-05	0.000285723	2.20701	Down-Regulated
ENPP2	-0.686112	7.36141	-4.37565	2.23787e-05	0.000291457	2.18274	Down-Regulated
ATRNL1	-0.615033	6.5141	-4.34777	2.50611e-05	0.000321409	2.07554	Down-Regulated
HLA-DRA	-0.792574	8.63051	-4.34241	2.56114e-05	0.000327695	2.05498	Down-Regulated
TMEM47	-0.623032	8.88133	-4.33724	2.61535e-05	0.000332994	2.03516	Down-Regulated
C21orf34	-0.808181	7.1544	-4.32681	2.72792e-05	0.000345524	1.99527	Down-Regulated
PDE8B	-0.798811	7.86299	-4.32097	2.79301e-05	0.000352923	1.97296	Down-Regulated
EPAS1	-0.607359	9.28689	-4.3153	2.85764e-05	0.000359886	1.95132	Down-Regulated
DNAJC3	-0.691629	9.03625	-4.3137	2.87604e-05	0.000361686	1.94525	Down-Regulated
LOC731682	-0.772936	8.09176	-4.29631	3.08464e-05	0.000383423	1.87902	Down-Regulated
CFB	-1.03181	8.02935	-4.28917	3.1743e-05	0.000392844	1.85192	Down-Regulated
FADS2	-0.971374	8.728	-4.24499	3.7879e-05	0.000455603	1.68489	Down-Regulated
TRPM8	-1.06444	10.0448	-4.24474	3.79167e-05	0.000455603	1.68395	Down-Regulated
FKBP5	-0.684237	9.62889	-4.24257	3.82463e-05	0.000458701	1.67577	Down-Regulated
SLC45A3	-0.872376	11.7542	-4.23415	3.95505e-05	0.000472658	1.6441	Down-Regulated
LOC653879	-1.05441	8.58369	-4.23319	3.97018e-05	0.000474251	1.64049	Down-Regulated
HLA-DPA1	-0.74965	9.71521	-4.22269	4.13936e-05	0.000491574	1.60108	Down-Regulated
SLC26A4	-1.04054	7.64679	-4.22128	4.16243e-05	0.000493428	1.59583	Down-Regulated
TIPARP	-0.638724	8.57225	-4.20616	4.41976e-05	0.000519047	1.53919	Down-Regulated
LOC100132552	-0.956733	8.48551	-4.20384	4.46042e-05	0.000522661	1.53055	Down-Regulated
SOAT1	-0.685157	9.01804	-4.19993	4.53004e-05	0.000529412	1.51593	Down-Regulated
KIAA1324	-0.811206	10.1756	-4.17239	5.05011e-05	0.000581962	1.41338	Down-Regulated
SLC43A1	-0.599381	8.73657	-4.15832	5.33734e-05	0.000610539	1.3612	Down-Regulated
THBS1	-0.974495	10.4103	-4.15438	5.42058e-05	0.000618723	1.34661	Down-Regulated
GEM	-0.611463	8.08623	-4.14495	5.6248e-05	0.00063763	1.31174	Down-Regulated
ST6GAL1	-1.07694	9.26003	-4.14396	5.6467e-05	0.000639838	1.30807	Down-Regulated
HGD	-0.934745	8.44871	-4.13669	5.8097e-05	0.000654662	1.28125	Down-Regulated
FAM13C	-0.663976	8.78202	-4.13075	5.94645e-05	0.000667512	1.25932	Down-Regulated
FAM135A	-0.895172	8.23289	-4.13008	5.96202e-05	0.000668975	1.25685	Down-Regulated
SLC26A5	-0.614809	6.82144	-4.09412	6.85892e-05	0.000754881	1.12482	Down-Regulated
DMXL1	-0.840025	9.53098	-4.08953	6.98218e-05	0.000765579	1.10805	Down-Regulated
SOCS3	-0.600821	8.37987	-4.07141	7.49018e-05	0.000814191	1.04193	Down-Regulated
TNFAIP3	-0.652562	8.09168	-4.05934	7.84785e-05	0.000846115	0.998023	Down-Regulated
LEPREL1	-0.842664	8.43514	-4.05115	8.09984e-05	0.000867624	0.968285	Down-Regulated
ERBB2IP	-0.590544	8.79496	-4.04929	8.15837e-05	0.000871423	0.961511	Down-Regulated
STK17B	-0.618334	8.77773	-4.04331	8.34846e-05	0.000889931	0.939842	Down-Regulated
GDF15	-0.830946	9.77144	-4.03008	8.7844e-05	0.000930507	0.891968	Down-Regulated
TIMP2	-0.604694	9.58484	-4.02099	9.09619e-05	0.000958052	0.859172	Down-Regulated
PTPRN2	-0.610833	9.02889	-4.01936	9.15313e-05	0.000963282	0.853305	Down-Regulated
GALNT12	-0.76697	7.29099	-4.00656	9.61318e-05	0.0010045	0.807206	Down-Regulated
LOC100134414	-1.05419	9.74775	-3.999	9.89494e-05	0.00103105	0.780056	Down-Regulated
LOC100133811	-0.663334	9.75506	-3.99451	0.000100663	0.00104563	0.763919	Down-Regulated
FBN1	-0.589377	8.04863	-3.99103	0.000102009	0.00105591	0.751438	Down-Regulated
ID2	-0.665598	8.15046	-3.97813	0.00010715	0.00109965	0.705256	Down-Regulated
IFI16	-0.585006	7.18295	-3.95817	0.00011559	0.00117037	0.634053	Down-Regulated
JUNB	-0.703469	10.1633	-3.95646	0.00011634	0.00117531	0.627983	Down-Regulated
ALOX15B	-0.937153	9.12331	-3.94265	0.000122587	0.00122898	0.578893	Down-Regulated
SLC4A4	-1.06944	9.76224	-3.92546	0.000130812	0.00129441	0.517959	Down-Regulated
PART1	-0.664574	6.45728	-3.92409	0.000131487	0.001299	0.513132	Down-Regulated
ERAP2	-0.729854	7.37184	-3.91743	0.000134828	0.00132804	0.489598	Down-Regulated
MAP1B	-0.606029	8.35644	-3.91019	0.000138549	0.00135762	0.464066	Down-Regulated
FOS	-1.09691	10.3919	-3.90726	0.000140087	0.00137015	0.453712	Down-Regulated
ACTBL3	-0.73876	10.4595	-3.89836	0.000144846	0.00140944	0.422393	Down-Regulated
PCGEM1	-1.38308	7.45613	-3.88416	0.000152759	0.00147	0.372541	Down-Regulated
LOC650770	-0.709948	9.2183	-3.86412	0.00016463	0.00156674	0.302425	Down-Regulated
LXN	-0.599631	6.66252	-3.85477	0.000170467	0.001613	0.269802	Down-Regulated
RDH11	-0.668196	10.6866	-3.8301	0.000186819	0.00173809	0.184055	Down-Regulated
BTG2	-0.652577	9.28268	-3.80468	0.000205221	0.00188128	0.0961707	Down-Regulated
GABRP	-0.661658	7.17758	-3.80294	0.000206538	0.00189073	0.0901902	Down-Regulated
CYP3A5	-0.69863	7.06029	-3.78458	0.000220972	0.00199796	0.0270388	Down-Regulated
ARRDC3	-0.677521	8.85721	-3.74801	0.000252615	0.00223741	-0.0979795	Down-Regulated
CXCR4	-0.737843	8.1912	-3.74752	0.000253071	0.00223995	-0.099666	Down-Regulated
ITPR1	-0.621044	8.50308	-3.74209	0.000258122	0.002275	-0.118115	Down-Regulated
AGR2	-1.07307	9.34604	-3.73983	0.000260256	0.00229051	-0.125801	Down-Regulated
IL7R	-0.729907	6.91767	-3.70174	0.00029882	0.00255427	-0.254715	Down-Regulated
NR4A2	-0.783137	8.13216	-3.6872	0.000314922	0.0026652	-0.303644	Down-Regulated
C3	-0.783285	8.7668	-3.67376	0.000330529	0.00277879	-0.348718	Down-Regulated
MAOB	-0.749735	8.45208	-3.65786	0.00034994	0.00291057	-0.401876	Down-Regulated
KL	-0.733175	7.49354	-3.63963	0.000373519	0.00307932	-0.462582	Down-Regulated
ZNF761	-0.59589	9.85473	-3.62732	0.00039027	0.00318958	-0.503409	Down-Regulated
C4A	-0.803838	9.14751	-3.60053	0.000429239	0.00344316	-0.591923	Down-Regulated
KLK2	-0.627295	12.678	-3.53728	0.000536256	0.00415418	-0.798651	Down-Regulated
POTEE	-0.72429	10.4182	-3.5199	0.000569792	0.00436715	-0.854912	Down-Regulated
POTEF	-0.736887	10.377	-3.517	0.000575566	0.0044007	-0.864261	Down-Regulated
LOC653781	-0.754314	10.4797	-3.50881	0.000592212	0.00450323	-0.89069	Down-Regulated
KRT23	-0.617064	7.02211	-3.50198	0.00060641	0.00458352	-0.912648	Down-Regulated
SLC2A12	-0.673579	8.33353	-3.49368	0.000624137	0.00469603	-0.939346	Down-Regulated
LOC100133135	-0.738706	10.2989	-3.47541	0.000664831	0.00494176	-0.997842	Down-Regulated
LOC653269	-0.737234	10.4119	-3.45671	0.000709072	0.00522218	-1.05747	Down-Regulated
JUN	-0.657343	9.65485	-3.45558	0.000711837	0.00523804	-1.06107	Down-Regulated
SCIN	-0.65719	7.42403	-3.4281	0.000782134	0.00565391	-1.14817	Down-Regulated
ARG2	-0.74101	9.30195	-3.41832	0.000808696	0.00581659	-1.17903	Down-Regulated
PCA3	-1.14847	10.3495	-3.41285	0.000823894	0.00590342	-1.19623	Down-Regulated
C4B	-0.709311	9.26047	-3.41156	0.000827523	0.00592621	-1.20029	Down-Regulated
LOC100133511	-0.678511	8.87721	-3.38888	0.000893798	0.00631027	-1.27143	Down-Regulated
FMO5	-0.666336	7.23229	-3.37265	0.000944238	0.00660817	-1.32209	Down-Regulated
LOC653198	-0.852902	7.66164	-3.34269	0.0010444	0.00718275	-1.41504	Down-Regulated
HLA-DQA1	-0.696082	7.63573	-3.33941	0.00105598	0.00724446	-1.4252	Down-Regulated
NAMPT	-0.654155	9.14174	-3.33758	0.00106245	0.00728323	-1.43084	Down-Regulated
SEC11C	-0.669089	9.25523	-3.29457	0.0012263	0.00816924	-1.56286	Down-Regulated
TGFB2	-0.604686	8.55949	-3.29394	0.00122889	0.00818035	-1.5648	Down-Regulated
POTEB	-0.613076	8.26854	-3.26426	0.00135564	0.00883943	-1.65503	Down-Regulated
LOC100130876	-0.637755	9.76602	-3.26329	0.00135995	0.00885891	-1.65795	Down-Regulated
TSPAN1	-0.589573	11.1051	-3.25966	0.00137633	0.00894784	-1.66894	Down-Regulated
ALDH1A1	-0.702036	7.80178	-3.19457	0.00170264	0.0105431	-1.8641	Down-Regulated
ATF3	-0.598885	8.5978	-3.18416	0.00176105	0.0108415	-1.89499	Down-Regulated
EGR1	-0.708494	10.8898	-3.15283	0.00194824	0.0117369	-1.98742	Down-Regulated
FOSB	-0.774084	9.56217	-3.10138	0.00229617	0.0133554	-2.1375	Down-Regulated
SFRP4	-0.67119	7.68757	-3.06704	0.00255948	0.0145603	-2.23646	Down-Regulated
LOC100133678	-0.784225	7.33861	-3.01868	0.00297778	0.0163694	-2.37418	Down-Regulated
RLN1	-1.12377	7.54642	-2.92888	0.00392549	0.0202491	-2.62472	Down-Regulated
MMP7	-0.764393	6.92101	-2.9263	0.00395642	0.0204007	-2.63182	Down-Regulated
TGM4	-1.26606	7.98221	-2.91385	0.00410891	0.0210201	-2.66602	Down-Regulated
SLC38A11	-0.747043	7.8133	-2.87446	0.00462715	0.023046	-2.77327	Down-Regulated
LOC728606	-0.656158	7.41087	-2.86397	0.00477498	0.0235736	-2.80163	Down-Regulated
LOC100134355	-0.67634	7.80892	-2.74483	0.00678347	0.0309261	-3.11707	Down-Regulated
CSGALNACT1	-0.593333	8.89461	-2.72681	0.00714642	0.0322088	-3.1637	Down-Regulated
LOC100134172	-0.682559	7.6044	-2.63862	0.00919037	0.0391591	-3.38802	Down-Regulated
